# **Insulin potentiates the synchronous firing of arcuate nucleus Kiss1 neurons that protects against diet-induced obesity**

**Jian Qiu<sup>a</sup>, Todd L. Stincic<sup>a</sup>, Martha A. Bosch<sup>a</sup>, Ashley M. Connors<sup>a</sup>, Stefanie Kaech Petrie<sup>b</sup>, Oline K. Rønnekleiv<sup>a,c</sup>, Martin J. Kelly<sup>a,c</sup>**

<sup>a</sup>Department of Chemical Physiology and Biochemistry, Oregon Health and Science University, Portland, United States

<sup>b</sup>Jungers Center for Neurosciences Research, Oregon Health and Science University, Portland, United States

<sup>c</sup>Division of Neuroscience, Oregon National Primate Research Center, Oregon Health and Science University, Beaverton, United States

Short Title: Insulin potentiates the synchronous activity of arcuate Kiss1 neurons

Co-corresponding Authors:

Jian Qiu, Ph.D. and Martin J. Kelly, Ph.D.

Department of Chemical Physiology and Biochemistry

Oregon Health and Science University

3181 SW Sam Jackson Park Road

Portland, Oregon, 97239, United States

Tel: 503-494-5835

E-mail: [qiuji@ohsu.edu](mailto:qiuji@ohsu.edu) or [kellym@ohsu.edu](mailto:kellym@ohsu.edu)

Number of Tables: 1

Number of Figures: 8

Word count: 7,580

Keywords: KNDy neurons, slow EPSP, insulin, TRPC5 channel, stromal interaction molecule 1

## Abstract

1 Kisspeptin neurons in the hypothalamic arcuate nucleus (Kiss1<sup>ARH</sup>) co-express kisspeptin, neurokinin B,  
2 dynorphin and provide an episodic, excitatory drive to gonadotropin-releasing hormone (GnRH) neurons, which  
3 is critical for pubertal development and fertility. Previously, we showed that high frequency firing of Kiss1<sup>ARH</sup>  
4 neurons co-releases NKB and dynorphin onto neighboring Kiss1<sup>ARH</sup> neurons to generate a slow excitatory  
5 postsynaptic potential (EPSP) that entrains intermittent, synchronous firing of Kiss1<sup>ARH</sup> neurons (Qiu et al.,  
6 2016). Presently, we discovered that insulin significantly increased the amplitude of the slow EPSP, which we  
7 documented is mediated by TRPC5 channels, and augmented synchronous GCaMP6s ([Ca]<sub>i</sub>) oscillations in  
8 Kiss1<sup>ARH</sup> neurons. Deletion of the endoplasmic reticulum calcium-sensing protein stromal interaction molecule 1  
9 in Kiss1<sup>ARH</sup> neurons amplified insulin's actions and protected ovariectomized female mice from developing  
10 obesity and glucose intolerance with high-fat dieting. Therefore, insulin appears to be critical for facilitating  
11 synchronous firing of Kiss1<sup>ARH</sup> neurons and coordinating energy homeostasis with fertility.

## Introduction

12  
13  
14  
15  
16 Multi-unit recordings first done in female rhesus macaques identified synchronous volleys of action potentials  
17 in the hypothalamic arcuate nucleus that correlated with pulsatile luteinizing hormone (LH) release (Knobil, 1981;  
18 Wilson et al., 1984). It was later proposed that hypothalamic arcuate kisspeptin (Kiss1<sup>ARH</sup>) neurons were  
19 responsible for the “pulse-generator” activity that stimulates pulsatile secretion of gonadotropin releasing  
20 hormone (GnRH) and subsequently LH (Lehman et al., 2010; Navarro V. M. et al., 2009), and multi-unit  
21 recordings targeting these neurons supported this hypothesis (Kinsey-Jones et al., 2008; Okamura et al., 2013).  
22 Indeed, recent experiments showed that high frequency optogenetic stimulation of Kiss1<sup>ARH</sup> neurons expressing  
23 channel rhodopsin (ChR2) generates pulsatile release of LH (Clarkson et al., 2017), and we elucidated the  
24 cellular mechanism responsible for synchronizing the “pulse generator” Kiss1<sup>ARH</sup> neurons (Qiu J. et al., 2016).  
25 Key to the synchronous firing of thousands of Kiss1<sup>ARH</sup> neurons is the fact that these neurons co-express  
26 neurokinin B (NKB) and dynorphin (Goodman et al., 2007), and high-frequency firing of Kiss1<sup>ARH</sup> neurons co-

27 releases NKB and dynorphin (Qiu J. et al., 2016). NKB binds to tachykinin 3 receptor (TacR3) in neighboring  
28 Kiss1<sup>ARH</sup> neurons to activate canonical transient receptor potential 5 (TRPC5) channels to cause a robust  
29 depolarization (slow EPSP), whereas co-released dynorphin feeds back to bind to presynaptic  $\kappa$ -opioid receptors  
30 to limit the release of NKB to discrete bursts of activity (Qiu J. et al., 2016). The co-release of the two peptide  
31 neurotransmitters coordinates the synchronous firing of Kiss1<sup>ARH</sup> neurons that drives the pulsatile release of  
32 GnRH into the median eminence (Clarkson et al., 2017; Qiu J. et al., 2016). This mode of synchronization  
33 appears to be quite different than what has been reported for organotypic cultures of immature kisspeptin  
34 neurons where the peptides have a modest effect on Ca<sup>2+</sup> oscillations (Kim et al., 2020).

35  
36 The metabolic hormones leptin and insulin excite/depolarize Kiss1<sup>ARH</sup>, and proopiomelanocortin (POMC),  
37 neurons through activation of TRPC5 channels (Kelly Martin J. et al., 2018; Qiu J. et al., 2011; Qiu J. et al., 2010;  
38 Qiu J. et al., 2014). In contrast, leptin and insulin inhibit/hyperpolarizes neuropeptide Y/agouti-related peptide  
39 (NPY/AgRP) neurons via activation of K<sub>ATP</sub> channels (Qiu J. et al., 2020; Qiu J., Wagner, et al., 2018; Qiu J. et  
40 al., 2014). The excitatory actions of leptin and insulin on Kiss1<sup>ARH</sup> and POMC neurons and inhibitory actions on  
41 NPY/AgRP neurons are complementary for mediating the anorexigenic effects of these metabolic hormones  
42 (Stincic et al., 2019). The increase in POMC and Kiss1<sup>ARH</sup> cell excitability induced by insulin translates into  
43 heightened transcriptional activity—*i.e.*, an increase in c-Fos expression in the arcuate nucleus following *icv*  
44 insulin (Qiu J. et al., 2014). Insulin delivered directly into the third ventricle uniformly decreases food intake in  
45 guinea pigs (Qiu J. et al., 2014), mice (Benoit et al., 2002; Brown et al., 2006) and rats (Clegg et al., 2011), which  
46 correlates with alterations in energy expenditure as manifested by increases in O<sub>2</sub> consumption, CO<sub>2</sub> production  
47 and metabolic heat production (Qiu J. et al., 2014). Optogenetic and pharmacogenetic stimulation of NPY/AgRP  
48 neurons rapidly increases food consumption (AponTE et al., 2011; Krashes et al., 2011), but stimulation of POMC  
49 neurons attenuates food intake (AponTE et al., 2011; Wei et al., 2018). Moreover, toxin-induced silencing of the  
50 “anorexigenic” Kiss1<sup>ARH</sup> neurons in females creates an obese phenotype (Padilla et al., 2019). The cumulative  
51 effects of leptin and insulin in ARH neurons are vital for both the short term (excitability) and long-term  
52 (transcriptional) modulation of neuronal activity and the control of food intake and ultimately energy homeostasis.

54 In POMC neurons the insulin receptor (InsR) couples to phosphoinositide 3-kinase (PI3K) p110 $\beta$  activation  
55 (Al-Qassab et al., 2009; Xu et al., 2005), and the InsR-mediated excitation of POMC neurons is abrogated by  
56 inhibition of PI3K activity (Al-Qassab et al., 2009; Hill et al., 2008; Qiu J. et al., 2010; Qiu J. et al., 2014). In  
57 Kiss1<sup>ARH</sup> neurons leptin signals via PI3K to activate TRPC5 channels (Qiu J. et al., 2011), and insulin has similar  
58 effects (Qiu J. et al., 2014). Activation of PI3K generates PIP<sub>3</sub>, which stimulates phospholipase C (PLC) and  
59 protein kinase B (Akt) (Bae et al., 1998; Falasca et al., 1998; Qiu J. et al., 2014; Rameh et al., 1998). PLC also  
60 hydrolyzes PIP<sub>2</sub>, which modulates TRPC4, 5 channel activity (Qiu J. et al., 2014; Rodríguez-Menchaca et al.,  
61 2012; Zhang, Bosch, et al., 2013). In addition, PI3K rapidly increases the insertion of TRPC5 channels into the  
62 plasma membrane from vesicular pools held in reserve beneath the membrane (Bezzarides et al., 2004). The  
63 increase in TRPC5 channel availability further boosts depolarization and Ca<sup>2+</sup> entry into neurons. Collectively,  
64 all of these PI3K-mediated effects are critically involved in the activation of TRPC5 channels by insulin actions  
65 in POMC, and presumably Kiss1 neurons (Qiu J., Bosch, et al., 2018).

66

67 A key molecule modulating the activity of TRPC channels is stromal-interaction molecule 1 (STIM1), which  
68 is localized to the endoplasmic reticulum (ER) membrane of cells, and its N-terminal domain contains an EF-  
69 hand that protrudes into the lumen of the ER to sense changes in ER Ca<sup>2+</sup> concentrations and maintain  
70 intracellular Ca<sup>2+</sup> homeostasis through store-operated Ca<sup>2+</sup> entry (SOCE) (Salido et al., 2011). Upon depletion  
71 of endoplasmic reticulum Ca<sup>2+</sup>, STIM1 undergoes a conformational change, oligomerizes and then interacts with  
72 plasma membrane calcium channels, including TRPC channels (Salido et al., 2011; Yuan et al., 2007). Under  
73 normal physiological conditions, TRPC5 channels are coupled to plasma membrane receptors (insulin receptor,  
74 leptin receptor, serotonin 5HT<sub>2C</sub> receptor) (Gao et al., 2017; Qiu J. et al., 2010; Qiu J. et al., 2014), but in cellular  
75 stressed states (e.g., obesity) it is thought that TRPC5 channels associate with STIM1 to replete endoplasmic  
76 reticulum Ca<sup>2+</sup> stores (Birnbaumer, 2009; Qiu J., Bosch, et al., 2018). We found that in POMC neurons estradiol  
77 protects against insulin resistance by downregulating *Stim1* expression and thereby maintaining the excitatory  
78 effects of insulin in obese females (Qiu J., Bosch, et al., 2018). Therefore, in the present study we generated  
79 *Kiss1<sup>Cre</sup>::Stim1<sup>lox/lox</sup>* mice to study the consequences of deletion of STIM1 on insulin's effects in Kiss1<sup>ARH</sup> neurons  
80 and ultimately its facilitatory effects on synchronization of pulse generator activity.

81

## 82 Results

83

### 84 Validation of conditional deletion of *Stim1* in *Kiss1* neurons

85

86 STIM1 is involved in the regulation of neuronal firing in cerebellar Purkinje neurons (Hartmann et al., 2014;  
87 Ryu et al., 2017), dopaminergic neurons (Sun et al., 2017) and hypothalamic arcuate POMC neurons (Qiu J.,  
88 Bosch, et al., 2018). First, to see if STIM1 regulates *Kiss1*<sup>ARH</sup> neuronal excitability, we determined mRNA  
89 expression of *Stim1* and its close homolog *Stim2* in manually harvested *Kiss1*<sup>ARH</sup> neurons by quantitative real-  
90 time PCR (**Figure 1A**). Based on the qPCR, mRNA levels of *Stim1* were greater than those of *Stim2* in *Kiss1*<sup>ARH</sup>  
91 neurons (**Figure 1A, left panel**). Likewise, in cerebellar Purkinje neurons, *Stim1* is also much more abundant  
92 than *Stim2* (Hartmann et al., 2014), while in hippocampal (Berna-Erro et al., 2009) and cortical neurons  
93 (Gruszczynska-Biegala et al., 2011) *Stim2* expression levels exceed those of *Stim1*. A qualitative, unbiased  
94 sampling of *Kiss1*<sup>ARH</sup> neurons (n=60) from ovariectomized *Kiss1*<sup>Cre</sup> females (n =3) revealed that *Stim1* mRNA  
95 was expressed in  $81.7 \pm 7.6$  percent and *Stim2* mRNA was detected in  $81.2 \pm 2.7$  percentage of *Kiss1*<sup>ARH</sup> neurons  
96 with 70 percentage expressing both *Stim1* and *Stim2*.

97

98 To elucidate the functional role of STIM1 in *Kiss1* neurons, we generated mice that lack STIM1 selectively in  
99 *Kiss1* neurons (*Stim1*<sup>kkO</sup>, detailed in Methods). We confirmed the *Stim1* deletion in *Stim1*<sup>kkO</sup> mice using single cell  
100 quantitative PCR of pools of harvested *Kiss1*<sup>ARH</sup> neurons (n= 3 animals) (**Figure 1A, middle**). Consistent with  
101 the scRT-PCR results (**Figure 1B**), *Stim1* mRNA was undetectable in *Stim1*<sup>kkO</sup> neurons (**Figure 1A, middle**),  
102 whereas there were no reduction in *Stim2* mRNA expression (**Figure 1A, right**).

103

104 Previous results show that insulin receptor (*Insr*) and *Trpc5* mRNA are expressed and involved in sculpting  
105 the excitability in *Kiss1*<sup>ARH</sup> neurons (Qiu J. et al., 2011; Qiu X. et al., 2013), and insulin excites *Kiss1*<sup>ARH</sup> neurons  
106 through activation of TPRC5 channels (Qiu J. et al., 2014). To see if *Insr* and *Trpc5* mRNAs are co-localized in  
107 *Kiss1*<sup>ARH</sup> neurons, we harvested 64 *Kiss1*<sup>ARH</sup> neurons from 3 females and did scRT-PCR for *Insr* and *Trpc5*

108 **(Figure 1C)**. The single-cell analysis revealed that *Insr* transcript was detected in 53% of Kiss1<sup>ARH</sup> neurons and  
109 *Trpc5* mRNA was found in 69% of neurons. Among *Trpc5*-positive Kiss1<sup>ARH</sup> neurons, 82% expressed *Insr*  
110 mRNA.

### 112 *Stim1* deletion reduces Store Operated Calcium Entry (SOCE)

113  
114 SOCE constitutes an important source of calcium entry and signaling in neurons. Depletion of ER Ca<sup>2+</sup> stores  
115 causes the ER Ca<sup>2+</sup> sensor STIM proteins (STIM1 and STIM2) to interact with and activate cell surface Ca<sup>2+</sup>  
116 release-activated Ca<sup>2+</sup> (CRAC) channels, thereby resulting in a second wave of cytoplasmic Ca<sup>2+</sup> rise (Moccia  
117 et al., 2015). Genetic suppression of *Stim1* in neural progenitor cells results in abrogation of this second wave  
118 of calcium rise that constitutes SOCE (Somasundaram et al., 2014). We asked whether deletion of *Stim1* in  
119 Kiss1<sup>ARH</sup> neurons (*Stim1*<sup>kkko</sup>) attenuates neuronal SOCE. We transfected Kiss1<sup>ARH</sup> or *Stim1*<sup>kkko</sup> neurons with  
120 GCaMP6s and imaged these neurons using spinning disk confocal microscopy (**Figure 2-video supplement 1**).  
121 ER Ca<sup>2+</sup> stores were released by treatment with 2 μM thapsigargin (Tg), a blocker of the SERCA  
122 (sarcoplasmic/endoplasmic reticulum Ca<sup>2+</sup> ATPase) pump. As expected, Tg treatment of neurons bathed in Ca<sup>2+</sup>-  
123 free aCSF generated an initial wave of cytoplasmic Ca<sup>2+</sup> release ([Ca<sup>2+</sup>]<sub>i</sub>) as measured by an increase in  
124 GCaMP6s activity both in control and *Stim1*-deleted neurons (**Figure 1D, E and F**). As long as neurons were  
125 kept in Ca<sup>2+</sup>- free aCSF, the ER stores remained empty, a situation that was presumably sensed by the Ca<sup>2+</sup>  
126 sensor STIMs. Upon switching to a normal aCSF containing 2 mM Ca<sup>2+</sup>, an immediate SOCE response was  
127 observed as a second wave of cytoplasmic Ca<sup>2+</sup> rise. Consistent with a role for STIM1 regulation, we observed  
128 an attenuation of SOCE in *Stim1*<sup>kkko</sup> neurons (**Figure 1D, E F and G**:  $\Delta F/F_0 \cdot 100 = 1274.5 \pm 49.4$ , n = 4, Kiss1<sup>ARH</sup>  
129 group versus  $389.0 \pm 86.1$ , n = 4, *Stim1*<sup>kkko</sup> group, which was measured from the 15 minute time point to the peak,  
130 unpaired t-test,  $t_{(6)} = 8.921$ ,  $p = 0.0001$ ,  $***p < 0.005$ ), indicating that STIM1 plays a major role in SOCE after Tg-  
131 induced ER Ca<sup>2+</sup> depletion in Kiss1<sup>ARH</sup> neurons as has been shown in other CNS neurons (Guner et al., 2017;  
132 Pavez et al., 2019).

133  
134 *TacR3* -induced increase in [Ca<sup>2+</sup>]<sub>i</sub> is augmented by deletion of *Stim1*

135

136

137

138

139

140

141

142

143

144

145

146

147

148

149

150

151

152

153

154

155

156

157

158

159

160

161

TacR3 classically couples to a Gαq protein and excites Kiss1<sup>ARH</sup> neurons (Ruka et al., 2013) (de Croft et al., 2013) (Qiu J. et al., 2016). Calcium is of critical importance to neurons as it participates in the transmission of depolarizing signals and contributes to synaptic activity (Brini et al., 2014). Therefore, we tested whether STIM1 can modulate TacR3-mediated calcium responses. We first measured the effects of the TacR3 agonist senktide on GCaMP6s-expressing Kiss1<sup>ARH</sup> neurons in arcuate slices from Kiss1<sup>Cre</sup> mice; senktide (1 μM) rapidly induced an increase in [Ca<sup>2+</sup>]<sub>i</sub> (**Figure 2A and C**). Next, we investigated if STIM1 protein contributes to [Ca<sup>2+</sup>]<sub>i</sub> in neurons after senktide activation from *Stim1*<sup>kkO</sup> mice; deletion of *Stim1* significantly augmented senktide responses (**Figure 2E and G**).  $\Delta F/F_0 \cdot 100 = 236.5 \pm 32.7$ , n = 5, Kiss1<sup>ARH</sup> group versus  $622.1 \pm 133.2$ , n = 6, *Stim1*<sup>kkO</sup> group at the 4 minute time point, unpaired t-test,  $t_{(11)} = 2.568$ , \*p = 0.0303 (**Figure 2C versus 2G**).

#### *Insulin augments the TacR3-mediated [Ca<sup>2+</sup>]<sub>i</sub> increase*

Given that insulin excites Kiss1<sup>ARH</sup> neurons (Qiu J. et al., 2014), we hypothesized that insulin would also potentiate TacR3-mediated [Ca<sup>2+</sup>]<sub>i</sub> increase. We perfused slices with insulin (20 nM) for 20 minutes, then administered a bolus of senktide directly into the recording chamber. We observed that the increase in peak [Ca<sup>2+</sup>]<sub>i</sub> was augmented by insulin in GCaMP6s-expressing Kiss1<sup>ARH</sup> neurons from *Kiss1*<sup>Cre</sup> and *Stim1*<sup>kkO</sup> mice (**Figure 2C and G**). The area under the curve was significantly different in the Kiss1<sup>ARH</sup> group similar to the *Stim1*<sup>kkO</sup> group comparing with and without pretreatment of insulin (**Figure 2D and H**).

#### *Deletion of STIM1 enhances slow EPSP in Kiss1<sup>ARH</sup> neurons*

Kiss1<sup>ARH</sup> neurons are the chief component of the GnRH pulse generator circuit (Lehman et al., 2010; Navarro V.M. et al., 2011; Navarro V. M. et al., 2009; Okamura et al., 2013), such that they synchronize their activity to trigger the release of peptides to drive pulsatile release of GnRH (Clarkson et al., 2017; Qiu J. et al., 2016). To investigate if STIM1 proteins modulate the activity of Kiss1<sup>ARH</sup> neurons, we bilaterally injected AAV1-Ef1a-DIO-



162 ChR2:mCherry into the arcuate nucleus of *Kiss1<sup>Cre</sup>* and *Stim1<sup>tko</sup>* mice (**Figure 3A**), and did whole-cell recordings  
163 of *Kiss1<sup>ARH</sup>* neurons expressing ChR2-mCherry in slices following photostimulation at 20 Hz for 10 s (**Figure 3-**  
164 **video supplement 1**) as previously described (Qiu J. et al., 2016). As we hypothesized, deletion of *Stim1*  
165 augmented the slow EPSP induced by high-frequency optogenetic stimulation (**Figure 3B-D**). Even in the  
166 presence of TTX to block voltage-gated Na<sup>+</sup> channels, we still saw that senktide induced larger inward currents  
167 in *Kiss1<sup>ARH</sup>* neurons from *Stim1<sup>tko</sup>* mice versus *Kiss1<sup>Cre</sup>* mice (**Figure 3E-G**).

#### 168 *Effects of insulin are mediated by increased TRPC5 channel activity*

170  
171 PI3K is essential for mediating the effects of insulin (Qiu J. et al., 2014), and it is also critical for the trafficking  
172 of TRPC channels (Bezzerrides et al., 2004). Therefore, we examined the role of PI3K in the insulin potentiation  
173 of the slow EPSP. To exclude the variability from the viral injections, we used *Kiss1<sup>Cre::Ai32</sup>* mice in which all  
174 EYFP neurons express *Kiss1* and ChR2 (see Methods). As expected, the selective PI3K inhibitor wortmannin  
175 (100 nM) robustly blocked the potentiation of the slow EPSP by insulin (**Figure 4A-E**). Next, we investigated a  
176 downstream effector of PI3K signaling based on our previous findings that TRPC5 channel protein is expressed  
177 in *Kiss1<sup>ARH</sup>* neurons (**Figure 1C**) (Qiu J. et al., 2011) and is activated by the NKB agonist senktide (Kelly Martin  
178 J. et al., 2018). To measure the TRPC5 channels contribution to the slow EPSP, we used a ratio method in  
179 which a slow EPSP was generated with optogenetic stimulation (20 Hz, 10 s) of a *Kiss1<sup>Cre</sup>:ChR2* neuron and  
180 then tested again 10 min later after drug exposure (Qiu J. et al., 2016). Using this protocol, we found that the  
181 slow EPSP was inhibited by perfusing the TRPC4/5 channel blocker HC 070 (100 nM) (Just et al., 2018) for 5  
182 mins, and the ratio was significantly decreased from 60 to 30 percent (**Figure 4F-H**). Since *Trpc4* mRNA is not  
183 expressed in *Kiss1<sup>ARH</sup>* neurons (Bosch et al., *unpublished data*), we would conclude that TRPC5 channels are  
184 mediating the slow EPSP in these neurons.

#### 185 186 *Insulin augments the slow EPSP in Stim1<sup>tko</sup> neurons*

187  
188 To test the hypothesis that insulin potentiates the slow EPSP in *Stim1<sup>tko</sup>* neurons to a greater extent than in



189 Kiss1<sup>ARH</sup> neurons, we pretreated ChR2-mCherry expressing arcuate slices from *Stim1<sup>kk0</sup>* mice with insulin.  
190 Indeed, we found that insulin augmented the slow EPSP by 60% beyond the effects of *Stim1* deletion on the  
191 slow EPSP. The TRPC5 channel blocker HC 070 (100 nM) reversed the effects of insulin indicating that the  
192 effects were mediated by increased TRPC5 channel activity (**Figure 5A-D**).

193  
194 To elucidate the TRPC5 channel contribution to the postsynaptic activity of Kiss1<sup>ARH</sup> neurons, we perfused  
195 TTX to block fast sodium channels and found that HC 070 significantly suppressed the senktide-induced inward  
196 current (**Figure 5E, F and H**). The I/V plot for the senktide-induced cation current exhibited the typical double-  
197 rectifying characteristics of TRPC5 channels with a reversal of -10 mV (**Figure 5G**) as we previously reported  
198 (Kelly Martin J. et al., 2018). These results indicate that TRPC5 channels also contribute to the synchronous  
199 activity of *Stim1<sup>kk0</sup>* neurons.

#### 201 *Stim1* deletion in Kiss1<sup>ARH</sup> neurons protects ovariectomized females against diet-induced obesity

202  
203 Two cohorts of female mice, *Stim1<sup>kk0</sup>* (n=10) and the littermate control *Kiss1<sup>Cre</sup>* (n=10) mice, were  
204 ovariectomized at 2-4 months of age and put on a high fat diet for eight weeks (see Methods). There was  
205 significantly less gain in body weight in the *Stim1<sup>kk0</sup>* versus the *Kiss1<sup>Cre</sup>* mice (**Figure 6A, B**). Moreover, the  
206 average fat mass of *Stim1<sup>kk0</sup>* mice was significantly less than that of *Kiss1<sup>Cre</sup>* controls by week 6 (*Stim1<sup>kk0</sup>* versus  
207 *Kiss1<sup>Cre</sup>* mice: 7.6 ± 0.9 g, n=10 versus 11.4 ± 1.1 g, n=10) (**Figure 6C**). The lean mass of *Stim1<sup>kk0</sup>* mice was  
208 significantly less versus the *Kiss1<sup>Cre</sup>* mice (*Stim1<sup>kk0</sup>* versus the *Kiss1<sup>Cre</sup>* mice: 16.9 ± 0.4 g, n=10 versus 18.9 ±  
209 0.4 g, n=10) (**Figure 6D**). After 6 weeks, both *Stim1<sup>kk0</sup>* and *Kiss1<sup>Cre</sup>* controls were assessed for glucose tolerance  
210 using an *i.p.* glucose tolerance test (see Methods). Both *Stim1<sup>kk0</sup>* and *Kiss1<sup>Cre</sup>* females started at relatively the  
211 same blood glucose levels after an overnight fast (**Figure 6E, time 0**), suggesting similar whole-body homeostatic  
212 conditions after fasting. However, *Stim1<sup>kk0</sup>* female mice had significantly lower glucose levels after *i.p.* glucose  
213 compared to *Kiss1<sup>Cre</sup>* females, indicating that *Stim1<sup>kk0</sup>* females were more glucose tolerant compared to *Kiss1<sup>Cre</sup>*  
214 controls. Moreover, *Stim1<sup>kk0</sup>* females had a significantly different glucose clearance rate than controls based on  
215 the integrated area under the curve (*Stim1<sup>kk0</sup>* versus the *Kiss1<sup>Cre</sup>* controls AUC: 20,232 ± 868 mg/dL × min, n =

6 vs  $22,622 \pm 624$  mg/dL  $\times$  min,  $n = 6$ ). Finally, when both groups were euthanized after eight weeks on HFD and tissues harvested for mRNA measurements, both the intrascapular brown adipose tissue (iBAT) and perigonadal adipose tissue (GAT) were dissected and weighed. Both iBAT and GAT mass were significantly less in the *Stim1<sup>kkO</sup>* versus the *Kiss1<sup>Cre</sup>* females (*Stim1<sup>kkO</sup>* versus the *Kiss1<sup>Cre</sup>* iBAT:  $73.3 \pm 6.0$  mg,  $n=10$  vs  $97.3 \pm 9.6$  mg,  $n=10$ ; *Stim1<sup>kkO</sup>* versus the *Kiss1<sup>Cre</sup>* GAT:  $1.5 \pm 0.2$  g,  $n=10$  vs  $2.3 \pm 0.2$  g,  $n=10$ ) (**Figures 6F, G**). Overall, these results suggest that conditional deletion of *Stim1* in *Kiss1<sup>ARH</sup>* neurons affords some protection against diet-induced obesity. However, we cannot overlook the possible contribution of deletion of *Stim1* in kisspeptin expressing hepatocytes (Song et al., 2014) to this metabolic phenotype.

*Stim1<sup>kkO</sup>* mice on the C57BL/6 background were viable at the expected Mendelian ratio and did not show any deficits in terms of the onset of female puberty (*i.e.*, vaginal opening). However, since kisspeptin neurons are responsible for the maintenance of the reproductive cycle, and *Stim1* deletion facilitated the synchronous firing of *Kiss1<sup>ARH</sup>* neurons, we measured the effects of *Stim1* deletion in *Kiss1* neurons on the reproductive cycle. We monitored the estrous cycle of *Stim1<sup>kkO</sup>* and *Kiss1<sup>Cre</sup>* female mice with vaginal lavage for two weeks before ovariectomy for the metabolic studies. *Stim1<sup>kkO</sup>* female mice exhibited exaggerated estrous cycles versus the *Kiss1<sup>Cre</sup>* females (**Figure 7B versus 7A**), with significantly more days of estrus versus diestrus (**Figure 7C**). Essentially, over this two week period *Kiss1<sup>Cre</sup>* females completed three estrous cycles versus only two cycles for the *Stim1<sup>kkO</sup>* females. Although a much more in depth analysis is warranted (*i.e.*, measurement of pulsatile LH), the results are not unexpected based on the prolonged synchronous activity that would be driving LH pulses in these female mice (Clarkson et al., 2017; Qiu J. et al., 2016).

## Discussion

For the first time, we show that conditional knockout of *Stim1* significantly reduces store-operated  $\text{Ca}^{2+}$  entry (SOCE) in *Kiss1<sup>ARH</sup>* neurons following thapsigargin-mediated depletion of  $\text{Ca}^{2+}$  stores. Based on single cell qPCR analysis, *Stim1* mRNA was expressed at approximately two-fold higher levels in *Kiss1<sup>ARH</sup>* neurons as compared to *Stim2*, and conditional knockout of *Stim1* did not alter expression of *Stim2* in *Kiss1<sup>ARH</sup>* neurons—

243 *i.e.*, there was no developmental compensation. Selective deletion of *Stim1* in Kiss1<sup>ARH</sup> neurons augmented the  
244 TacR3-mediated increase in [Ca<sup>2+</sup>]<sub>i</sub> and synchronous firing of Kiss1<sup>ARH</sup> neurons, and this activity was further  
245 enhanced by *in vitro* insulin treatment. In addition, whole-cell recording revealed that the slow EPSP induced by  
246 high-frequency optogenetic stimulation of Kiss1<sup>ARH</sup>:ChR2 neurons was also significantly enhanced by *Stim1*  
247 deletion. This augmentation of the slow EPSP was mediated by TacR3 coupling to TRPC5 channel activation  
248 since the senktide-induced inward current was equally enhanced; and the inward current exhibited the tell-tale  
249 double rectifying I/V plot of TRPC5 channels and was antagonized by the TRPC4/5 channel blocker HC070.  
250 The rapid insulin effects were abrogated by PI3K kinase inhibitor wortmannin. Importantly, the enhanced TacR3  
251 signaling in *Stim1*<sup>cko</sup> female mice afforded protection against diet-induced obesity and glucose intolerance.

252  
253 We first discovered that TRPC5 channels are coupled to metabolic hormone signaling in both POMC and  
254 Kiss1<sup>ARH</sup> neurons (Qiu J. et al., 2011; Qiu J. et al., 2010; Qiu J. et al., 2014). Both leptin and insulin  
255 excite/depolarize Kiss1<sup>ARH</sup> and proopiomelanocortin (POMC) neurons through activation of TRPC5 channels  
256 (Kelly Martin J. et al., 2018; Qiu J. et al., 2011; Qiu J. et al., 2010; Qiu J. et al., 2014). In POMC neurons the  
257 insulin receptor (InsR) couples to phosphoinositide 3-kinase (PI3K) p110 $\beta$  activation (Al-Qassab et al., 2009; Xu  
258 et al., 2005), and the insulin receptor-mediated excitation of POMC and Kiss1<sup>ARH</sup> neurons is abrogated by  
259 inhibition of PI3K activity (Al-Qassab et al., 2009; Hill et al., 2008; Qiu J. et al., 2010; Qiu J. et al., 2014) (**Figure**  
260 **4**). Activation of PI3K generates PIP<sub>3</sub>, which stimulates phospholipase C (PLC) and protein kinase B (Akt) (Bae  
261 et al., 1998; Falasca et al., 1998; Qiu J. et al., 2014; Rameh et al., 1998). PLC hydrolyzes PIP<sub>2</sub>, which modulates  
262 TRPC5 channel activity (Qiu J. et al., 2014; Rodríguez-Menchaca et al., 2012; Zhang, Bosch, et al., 2013). In  
263 addition, PI3K quickly increases the vesicular trafficking of TRPC5 channels to the plasma membrane to further  
264 boost Ca<sup>2+</sup> entry into neurons (Bezzarides et al., 2004), which would explain the relatively rapid effects of insulin  
265 to increase the slow EPSP following high frequency optogenetic stimulation of Kiss1<sup>ARH</sup>:ChR2 neurons (**Figure**  
266 **4**) and the senktide-mediated increase in GCaMP6s activity (**Figure 2**). Therefore, insulin appears to have dual  
267 complementary actions to directly activate TRPC5 channels and to mobilize intracellular vesicular pools of  
268 TRPC5 channels to augment NKB actions to synchronize Kiss1<sup>ARH</sup> neuronal firing via PI3K signaling pathways  
269 (Qiu J. et al., 2016; Qiu J. et al., 2014).

270

271

272

273

274

275

276

277

278

279

280

281

282

283

284

285

286

287

288

289

290

291

292

293

294

295

296

More recently, we have discovered a critical role of STIM1 in the insulin signaling cascade in POMC neurons (Qiu J., Bosch, et al., 2018). TRPC channels form either receptor-operated cation channels (activated by membrane delimited receptors) or store-operated calcium channels (activated by depletion of calcium stores), which is dependent on their association with STIM1 and plasma membrane calcium channels (e.g., TRPC and Orai channels) to generate SOCE (Birnbaumer, 2009; Salido et al., 2011; Wang H. et al., 2020). Upon depletion of endoplasmic reticulum  $Ca^{2+}$ , STIM1 undergoes a conformational change, oligomerizes and then interacts with plasma membrane Orai and TRPC channels to become plasma membrane calcium release-activated calcium ( $I_{crac}$ ) channels (Huang et al., 2006; Salido et al., 2011; Yuan et al., 2007). *Stim1* mRNA is highly expressed in POMC (Qiu J., Bosch, et al., 2018) and Kiss1<sup>ARH</sup> neurons (**Figure 1**), and estradiol downregulates *Stim1* mRNA expression, as measured in microdissected arcuate nuclei that encompasses these two populations of neurons. Downregulation of *Stim1* is critical for maintaining insulin excitability in POMC neurons with diet-induced obesity (Qiu J., Bosch, et al., 2018). In ovariectomized females that are relatively refractory to insulin excitation, bath perfusion of a SOCE inhibitor (GSK 7975A) rapidly increases the insulin-mediated excitation of POMC neurons (i.e., activation of the TRPC5 mediated inward current), which supports the concept that TRPC5 channels play a role both in SOCE and receptor operated calcium entry (Birnbaumer, 2009; Salido et al., 2011). Therefore, selective deletion of *Stim1* in Kiss1<sup>ARH</sup> neurons would ensure that TRPC5 channels function as receptor-operated channels to not only couple to insulin (tyrosine kinase) receptors but also to TacR3s to transmit the excitatory effects of NKB to induce synchronous firing of Kiss1<sup>ARH</sup> neurons as demonstrated in the present findings.

Downregulating STIM1 inhibits SOCE, attenuates  $Ca^{2+}$  influx into the ER and elevates intracellular  $Ca^{2+}$  levels, which could also contribute to activation of TRPC5 channels in Kiss1<sup>ARH</sup> neurons (Blair et al., 2009). Indeed, we found that  $Ca^{2+}$  greatly potentiated the leptin-induced TRPC5 current in POMC neurons (Qiu J. et al., 2010). In cortical neurons and heterologous cells expressing *Cav1.2* (L-type calcium) channels and *Stim1*, inhibition of STIM1 augments  $Ca^{2+}$  influx through L-type calcium channels (Park et al., 2010; Wang Y. et al., 2010). Calcium sensing by STIM1 is also involved in the control of L-type  $Ca^{2+}$  channel activity in the hippocampus (Dittmer et al., 2017). In hippocampal pyramidal neurons, glutamate-mediated depolarization

297 activates L-type calcium channels and release of  $\text{Ca}^{2+}$  from ER stores that activates STIM1, which drives  
298 aggregation of the calcium channels to inhibit further L-type channel activity (Dittmer et al., 2017). In  
299 cardiomyocyte-derived (HL-1) cells, knocking down STIM1 increases the peak amplitude and current density of  
300 T-type calcium channels and shifts the activation curve toward more negative membrane potentials (Nguyen et  
301 al., 2013). Furthermore, biotinylation assays reveal that knocking down *Stim1* increases T-type calcium channel  
302 surface expression, and co-immunoprecipitation assays suggest that STIM1 directly regulates T-type channel  
303 activity (Nguyen et al., 2013). Thus, STIM1 appears to be a negative regulator of T-type channel activity.  
304 Moreover, estradiol treatment upregulates *Cav3.1* channel expression by 3-fold and whole cell currents by 10-  
305 fold in *Kiss1<sup>ARH</sup>* neurons, which greatly enhances the excitability and contributes to synchronous firing of *Kiss1<sup>ARH</sup>*  
306 neurons (Qiu J., Rivera, et al., 2018). The T-type calcium channel *Cav3.1* underlies burst firing in rostral  
307 hypothalamic kisspeptin neurons (Zhang, Tonsfeldt, et al., 2013) and facilitates TRPC4 channel activation in  
308 GnRH neurons (Zhang, Bosch, et al., 2013; Zhang et al., 2008). *Cav3.1* channels may also facilitate TRPC5  
309 channel opening in *Kiss1<sup>ARH</sup>* neurons (**Figure 8**), but this remains to be determined.

310  
311 Presumably with conditional knockout, *Stim1* was deleted in all cells expressing kisspeptin, which includes  
312 arcuate, anteroventral periventricular preoptic (AVPV) and amygdala kisspeptin neurons, and non-neural  
313 kisspeptin cells in the gonads, pancreas and liver (Dudek et al., 2019). Currently, we found that the deletion of  
314 *Stim1* in hypothalamic kisspeptin neurons, and possibly the ovarian follicles, disrupted the estrous cycle (**Figure**  
315 **7**). Interestingly, *Stim1<sup>kko</sup>* mice exhibited more estrous-type vaginal cytology, which is indicative of higher levels  
316 of circulating estrogens and maybe the result of increased synchronous firing of kisspeptin neurons and  
317 excitatory drive to GnRH neurons (Qiu J. et al., 2016). Because of the well-documented anorexigenic actions  
318 of E2 on hypothalamic POMC and AgRP neurons controlling energy homeostasis (Clegg, 2012; Kelly M. J. and  
319 Rønnekleiv, 2012; Qiu J. et al., 2006; Roepke et al., 2010; Smith et al., 2013), we ovariectomized the females  
320 before feeding them a high fat diet. We tested the hypothesis that *Stim1* deletion in *Kiss1<sup>ARH</sup>* neurons would  
321 facilitate insulin signaling to maintain energy balance (Navarro Víctor M., 2020; Qiu J., Rivera, et al., 2018). After  
322 7 weeks on a high fat diet, *Stim1<sup>kko</sup>* females gained modestly less body weight but showed significantly less body  
323 fat and lean mass than high fat-dieted, ovariectomized *Kiss1<sup>Cre</sup>* females. Most importantly, *Stim1<sup>kko</sup>* females

324 exhibited improved glucose tolerance. Interestingly, the effects of *Stim1* deletion in Kiss1<sup>ARH</sup> neurons are  
325 analogous to the augmented excitatory effects of insulin in POMC neurons following conditional knockout of the  
326 T-cell protein tyrosine phosphatase (TCPTP) (Dodd Garron T. et al., 2018). Expression of TCPTP is highly  
327 regulated by the metabolic state such that its expression increases in fasted and obese states (Dodd G. T. et al.,  
328 2015; Dodd Garron T. et al., 2018). The tyrosine phosphatase through its dephosphorylation of STAT3 inhibits  
329 downstream signaling of leptin and insulin in POMC neurons (Dodd Garron T. et al., 2018). Moreover, Kiss1<sup>ARH</sup>  
330 neurons are an integral part of an anorexigenic circuit in the hypothalamus (Navarro Víctor M., 2020; Qiu J.,  
331 Rivera, et al., 2018; Rønnekleiv et al., 2019) and may provide the excitatory glutamatergic drive to the  
332 paraventricular hypothalamus to generate rapid satiety following a meal (Fenselau et al., 2017). However, future  
333 experiments will need to test this directly by using ChR2-assisted circuit mapping along with high frequency  
334 stimulation of Kiss1<sup>ARH</sup> neurons to further document this pathway (Qiu J., Rivera, et al., 2018)

335  
336 Presently, there is compelling evidence that Kiss1<sup>ARH</sup> neurons are the critical “command” neuron for  
337 coordinating energy states with reproductive functions (see (Navarro Víctor M., 2020; Rønnekleiv et al., 2019)  
338 for review). Insulin may be the critical metabolic hormone providing feedback since neuron-specific deletion of  
339 insulin receptors causes hypothalamic hypogonadism and infertility (Bruning et al., 2000). Moreover, insulin  
340 stimulates pulsatile LH secretion by the pituitary gland in diabetic animal models (Bucholtz et al., 2000), and  
341 administration of kisspeptin in type 2 diabetic males with central hypogonadism increases LH pulses and  
342 enhances gonadal testosterone secretion (George et al., 2013). While it is unclear if GnRH neurons are directly  
343 regulated by insulin (Sliwowska et al., 2014), Kiss1<sup>ARH</sup> neurons express insulin receptors and are robustly  
344 depolarized by physiological levels of insulin (Qiu J. et al., 2014; Rønnekleiv et al., 2019). Not only does insulin  
345 depolarize Kiss1<sup>ARH</sup> neurons via opening TRPC5 channels (Qiu J. et al., 2011; Qiu J. et al., 2014), presently we  
346 found that insulin increases the excitatory response to NKB to augment synchronous firing of Kiss1<sup>ARH</sup> neurons.  
347 Also, we have now documented that conditional knockout of *Stim1* in Kiss1<sup>ARH</sup> neurons, which augments the  
348 NKB-mediated depolarization of these neurons via TRPC5 channels, helps protect ovariectomized, female mice  
349 from diet-induced obesity and glucose intolerance. Therefore, insulin excitation of Kiss1<sup>ARH</sup> neurons not only  
350 enhances synchronous activity (pulse generator activity) to provide excitatory drive to GnRH neurons for



351 maintaining reproductive functions (Clarkson et al., 2017; Kinsey-Jones et al., 2008; Okamura et al., 2013) but  
352 also contributes to energy homeostasis in satiated states (Qiu J., Rivera, et al., 2018; Tolson et al., 2014).  
353 Clearly, Kiss1<sup>ARH</sup> neurons are a CNS center for coordinating reproduction with energy balance, but additional  
354 experiments are needed to elucidate the cellular mechanisms by which steroid and metabolic hormonal signaling  
355 synergize to govern their activity.

## 357 **Materials and Methods**

### 359 *Animals*

361 All animal procedures were conducted at Oregon Health and Science University (OHSU) according to the  
362 National Institutes of Health Guide for the Care and Use of Laboratory Animals and with approval from the OHSU  
363 Animal Care and Use Committee.

365 We used female mice in all of the experiments. *Kiss1*<sup>Cre:GFP</sup> (v2) mice (Padilla et al., 2018) were housed  
366 under constant temperature (21–23°C) and 12-h light, 12-h dark cycle schedule (lights on at 0600 and lights off  
367 at 1800 h), with free access to food (Lab Diets 5L0D) and water. *Kiss1*<sup>Cre:GFP</sup> mice were used for viral injection  
368 to express ChR2 or GCaMP6s in Kiss1<sup>ARH</sup> neurons or they were crossed with heterozygous *Ai32* mice  
369 (RRID:IMSR\_JAX:024109, C57BL/6 background) purchased from The Jackson Laboratory. These *Ai32* mice  
370 carry the ChR2 (H134R)–EYFP gene in their Gt(ROSA)26Sor locus (Madisen et al., 2012). The gene is  
371 separated from its CAG promoter by a loxP-flanked transcriptional STOP cassette, allowing its expression in a  
372 Cre-dependent manner. To test for this we dispersed and harvested EYFP neurons in the ARH from  
373 *Kiss1*<sup>Cre:GFP</sup>::*Ai32* females and used single cell RT-PCR to determine *Kiss1* mRNA expression as described  
374 below and according to previous published methods (Bosch et al., 2013). Data from 158 ARH<sup>EYFP</sup> neurons from  
375 6 *Kiss1*<sup>Cre:GFP</sup>::*Ai32* females documented that 99% of the EYFP neurons expressed *Kiss1*, which is similar to  
376 data obtained from *Kiss1*<sup>Cre:GFP</sup> females (99% of 448 neurons harvested from 12 females expressed *Kiss1*).



378 To generate mice with conditional knockout of *Stim1* in Kiss1 neurons (*Stim1<sup>KKO</sup>*), we first crossed *Kiss1<sup>Cre:GFP</sup>*  
379 (v2) mice (Padilla et al., 2018) to *Stim1<sup>lox/lox</sup>* mice (Jackson Laboratory Stock #023350, RRID:IMSR\_JAX:023350,  
380 (Oh-hora et al., 2008)). This cross knocks out *Stim1* through excising exon 2 (Oh-hora et al., 2008) of the floxed  
381 *Stim1* gene in cells in which Cre is expressed under the control of a promoter specific for the expression of *Kiss1*  
382 (Padilla et al., 2018; Qiu J., Rivera, et al., 2018). We then bred *Kiss1<sup>Cre:GFP</sup>::Stim1<sup>lox/+</sup>* males with *Stim1<sup>lox/lox</sup>*  
383 females to get *Kiss1<sup>Cre:GFP</sup>::Stim1<sup>lox/lox</sup>* (*Stim1<sup>KKO</sup>*) mice. To maintain the strain, we bred *Stim1<sup>KKO</sup>* males with  
384 *Stim1<sup>lox/lox</sup>* females. Genotypes for *Stim1* were determined using forward primer JAX#18885 (5'-CGA TGG TCT  
385 CAC GGT CTC TA-3') and reverse primer JAX#18886 (5'-GCT CTG CTG ACC TGG AAC TA-3'), which  
386 distinguished between lox/lox, lox/+, and +/+ genotypes. Cre genotypes were determined using forward primer  
387 5'-GCG GTC TGG CAG TAA AAA CTA TC3'- and reverse primer 5'-TTC CAT GAG TGA ACG AAC CTG G-3',  
388 which distinguished between carriers and non-carriers of the Cre allele.

390 To determine whether deleting *Stim1* in Kiss1-expressing neurons might impact fertility, we evaluated female  
391 *Stim1<sup>KKO</sup>* mice and Cre-negative *Stim1<sup>lox/lox</sup>* littermates for pubertal onset and estrous cyclicity. Puberty onset in  
392 females was assessed by monitoring for vaginal opening daily between 0900 and 1000 hr starting at 3 weeks of  
393 age. For estrous cycle studies, female mice were group housed and handled prior to estrous cycle monitoring.  
394 Vaginal lavage was performed daily for 4 consecutive weeks between 0900 and 1000 hr. Cytology was  
395 evaluated using a light microscope and scored as diestrus, proestrus or estrus as previously described (Qiu J.,  
396 Rivera, et al., 2018).

### 398 *Puberty onset and estrous cyclicity*

399 To determine whether deleting *Stim1* in Kiss1-expressing neurons might impact fertility, we evaluated female  
400 *Stim1<sup>KKO</sup>* mice and wild type (WT) females littermates for pubertal onset and estrous cyclicity. Puberty onset in  
401 females was assessed by monitoring for vaginal opening daily between 0900 and 1000 hr starting at 3 weeks of  
402 age. For estrous cycle studies, *Kiss1<sup>KKO</sup>* and *Kiss1<sup>Cre:GFP</sup>* female mice were group housed and were habituated to  
403 handling for at least one week by the same investigator prior to estrous cycle monitoring. Vaginal lavage was  
404 performed daily for 13 consecutive days between 0900 and 1000 hr. Cytology was evaluated using a light

405 microscope and scored as diestrus, proestrus or estrus as previously described (Qiu J., Rivera, et al., 2018).  
406 The Number of estrous and diestrus days were counted for each animal and used for statistical analysis (Mann-  
407 Whitney U-test).

#### 409 *Gonadectomy*

410  
411 When necessary, at least 7 days prior to each experiment, ovaries were removed as described previously  
412 while under inhalant isoflurane anesthesia (Piramal Enterprises Limited, Andhra Pradesh, India) (Qiu, 2018,  
413 20613}. Each mouse received analgesia (Carprofen; 5mg/kg; subcutaneous) immediately after a surgery for  
414 relief of postoperative pain.

#### 416 *Metabolic Studies*

417 For the metabolic studies, *Stim1<sup>kk0</sup>* and *Kiss1* littermate control females were ovariectomized at 2-4 months  
418 of age and put on a high fat diet (HFD; 45% kcal from fat; Research Diets, New Brunswick, NJ; D12451) for eight  
419 weeks. Mice were group housed (because of COVID-19 restrictions) and individually weighed every week. The  
420 evening prior to the glucose tolerance test (GTT), all mice were assessed for body composition (fat and lean  
421 mass) using an EchoMRI 4-in-1-500 Body Composition Analyzer (Houston, TX).

422  
423 For GTT, age matched *Kiss1<sup>Cre</sup>* and *Stim1<sup>kk0</sup>* mice were fasted for overnight for 15-h, and baseline glucose  
424 levels measured with the aid of an Accu-Check Advantage blood glucose meter (Roche) using blood collected  
425 from the tail vein. All mice were then injected intraperitoneally with glucose (1 mg/g lean mass as determined by  
426 EchoMRI) in sterile PBS and blood glucose levels were measured 15, 30, 60, 90, and 120 min after injection.  
427 The glucose clearance (area under the curve) was calculated based on the glucose baseline levels at 0 min  
428 (Ayala et al., 2010).

429  
430  
431 *AAV delivery to Kiss1<sup>Cre:GFP</sup> and Stim1<sup>kk0</sup> mice*

432

433 Fourteen to twenty-one days prior to each experiment, *Kiss1<sup>Cre:GFP</sup>* mice or *Stim1<sup>tko</sup>* mice (>60 days old)  
434 received bilateral ARH injections of a Cre-dependent adeno-associated viral (AAV; serotype 1) vector encoding  
435 ChR2-mCherry (AAV1-Ef1a-DIO-ChR2: mCherry) or ChR2-YFP (AAV1-Ef1a-DIO-ChR2:YFP) or GCaMP6s  
436 (AAV9-Syn-Flex-GCaMP6s-WPRE-SV40). Using aseptic techniques, anesthetized female mice (1.5%  
437 isoflurane/O<sub>2</sub>) received a medial skin incision to expose the surface of the skull. The glass pipette (Drummond  
438 Scientific #3-000-203-G/X; Broomall, PA) with a beveled tip (diameter = 45 μm) was filled with mineral oil, loaded  
439 with an aliquot of AAV using a Nanoject II (Drummond Scientific). ARH injection coordinates were anteroposterior  
440 (AP): -1.20 mm, mediolateral (ML): ± 0.30 mm, dorsoventral (DL): -5.80 mm (surface of brain z = 0.0 mm); 500  
441 nl of the AAV (2.0 × 10<sup>12</sup> particles/ml) was injected (100 nl/min) into each position, left in place for 10 min post-  
442 injection, then the pipette was slowly removed from the brain. The skin incision was closed using skin adhesive,  
443 and each mouse received analgesia (Carprofen; 5 mg/kg) for two days post-operation.

444

#### 445 *Electrophysiology*

446

447 Coronal brain slices (250 μm) containing the ARH from gonadectomized females were prepared as  
448 previously described (Qiu J. et al., 2003). Whole-cell, patch recordings were performed in voltage clamp and  
449 current clamp using an Olympus BX51W1 upright microscope equipped with video-enhanced, infrared-  
450 differential interference contrast (IR-DIC) and an Exfo X-Cite 120 Series fluorescence light source. Electrodes  
451 were fabricated from borosilicate glass (1.5 mm outer diameter; World Precision Instruments, Sarasota, FL) and  
452 filled with a normal internal solution (in mM): 128 potassium gluconate, 10 NaCl, 1 MgCl<sub>2</sub>, 11 EGTA, 10 HEPES,  
453 3 ATP, and 0.25 GTP (pH was adjusted to 7.3–7.4 with 1N KOH, 290–300 mOsm). Pipette resistances ranged  
454 from 3–5 MΩ. In whole cell configuration, access resistance was less than 20 MΩ; access resistance was 80%  
455 compensated. For optogenetic stimulation, a light-induced response was evoked using a light-emitting diode  
456 (LED) 470 nm blue light source controlled by a variable 2A driver (ThorLabs, Newton, NJ) with the light path  
457 delivered directly through an Olympus 40 water-immersion lens. High fidelity response to light (470 nm)  
458 stimulation of *Kiss1<sup>ARH</sup>::ChR2-mCherry* expressing neurons was observed, and both evoked inward currents (in

459 voltage clamp,  $V_{\text{hold}} = -60$  mV) or depolarization (in current clamp) were measured. Electrophysiological signals  
460 were amplified with an Axopatch 200A and digitized with Digidata 1322A (Molecular Devices, Foster City, CA),  
461 and the data were analyzed using p-Clamp software (RRID:SCR\_011323, version 9.2, Molecular Devices). The  
462 amplitude of the slow EPSP was measured after low pass filtering in order to eliminate the barrage of action  
463 potentials riding on the depolarization. The liquid junction potential was corrected for all data analysis.

#### 464 465 *Calcium imaging*

466  
467 For calcium imaging, brain slices were placed in a RC-22C slide recording chamber (Harvard/Warner  
468 Instruments) and imaged on an inverted Nikon TiE microscope equipped with a Yokogawa CSU-W1 spinning  
469 disk confocal head, integrated under NIS Elements v4.20 (Nikon). The preparation, kept at 32°C via a cage  
470 incubator (Okolab), was continuously perfused with oxygenated aCSF at a flow rate of 1.25 ml/min. Images were  
471 acquired on a Zyla v5.5 sCMOS camera (Andor) at 0.5 Hz. frame-rate, through an 10 x (NA 0.45) or 20 x (NA  
472 0.75) objective, combining 488 nm laser excitation with 500–550 nm emission collection. Changes in Kiss1<sup>ARH</sup>  
473 neuron  $\text{Ca}^{2+}$  levels were measured in regions of interest (ROIs) comprising the GCaMP6s-positive cell bodies.  
474 In all recordings, background fluorescence measured in an ROI drawn on nearby tissue was subtracted from  
475 every ROI.  $[\text{Ca}^{2+}]_i$  variations after drug applications were assessed as changes in fluorescence signals over  
476 baseline ( $\Delta F/F_0$ ). To normalize the fluorescence value of each cell, we first separated experimental trials into  
477 two parts: a baseline period (2 min) corresponding to all the frames recorded before addition of drugs, and a  
478 stimulus period, after the onset of the drug (such as bath-applied senktide) application and lasting several  
479 minutes. Next, for each ROI we calculated  $\Delta F/F_0$  for each frame (t), where  $\Delta F/F_0$  equals  $(F_{(t)} - F_0)/F_0$ , and  $F_0$  was  
480 the mean fluorescence value for that ROI for all frames in the baseline period for that trial. The area under the  
481 curve (AUC) was calculated over the time period of 2 min before and the 18 min after drug application. Maximal  
482 peak reached after drug application was also measured and used in quantitative analysis. Data were averaged  
483 across all Kiss1<sup>ARH</sup> neurons in a slice (two slices per animal), which were used as the statistical unit over a  
484 minimum of 3 animals per condition.

486 *Single cell RT-PCR (scRT-PCR)*

487

488 Coronal brain sections from the ARH of three female *Stim1<sup>kko</sup>* and three *Kiss1<sup>Cre:GFP</sup>::Ai32* mice were prepared

489 for electrophysiology. The 3-4 sections obtained were divided between electrophysiological recording

490 experiments and single cell harvesting. Single cell dispersion and harvesting was performed as described

491 previously with some modifications (Bosch et al., 2013; Zhang, Tonsfeldt, et al., 2013). Briefly, the ARH was

492 dissected and digested in papain (Sigma). Gentle trituration using varying sizes of flame polished Pasteur pipets

493 were used to disperse the cells and then they were plated onto a glass bottom dish. A constant flow of

494 oxygenated aCSF (NaCl, 125 mM; KCl, 5 mM; NaH<sub>2</sub>PO<sub>4</sub>, 1.44 mM; Hepes, 5 mM; D-glucose, 10 mM; NaHCO<sub>3</sub>,

495 26 mM; MgSO<sub>4</sub>·7H<sub>2</sub>O, 2 mM; CaCl<sub>2</sub>, 2 mM) was applied to the dish to keep the cells healthy and to clear debris.

496 Fluorescent neurons were visualized under an inverted microscope. The Xenoworks Microinjection system

497 (Sutter Instruments) was used to manipulate a 10 μm tip size glass capillary tube to approach single neurons,

498 apply gently suction and harvest single cells or pools of 10 cells into a siliconized tube containing a solution of

499 1X Invitrogen Superscript III Buffer (LifeTech), 15U of RNasin (Promega), 10 mM of dithiothreitol (DTT) and

500 diethylpyrocarbonate (DEPC)-treated water in a total of 5 μl for single cells or 8 μl for pools of 10 cells.

501 Corresponding controls were collected at the same time including single neurons (processed without reverse

502 transcriptase) and aCSF from the surrounding area. Hypothalamic tissue RNA was also processed with and

503 without reverse transcriptase. First strand cDNA synthesis was performed on single cells, pools of cells and

504 controls in a 20 μl (single cells) or 25 μl (10 cell pools) volume containing a final concentration of 1X Invitrogen

505 Superscript III Buffer, 30 U of RNasin, 15 mM DTT, 10 mM dNTP, 100 ng Random Primers (Promega), 400 ng

506 Anchored Oligo (dT)<sub>20</sub> Primer (Invitrogen), 100 U Superscript III Reverse Transcriptase (Life Tech) and DEPC-

507 treated water according to manufactures protocol and stored at -20°C. Clone Manager software (Sci Ed

508 Software) was used to design primers that cross at least one intron-exon boundary. In order to confirm that

509 STIM1 was knocked out, STIM1 primers were designed to include part of exon 2 (see Table 1). Single cell PCR

510 conditions were optimized for primer concentration, magnesium concentration and annealing temperature.

511 Standard curves were generated using hypothalamic cDNA with dilutions from 1:50 to 1:12,800 for primers used

512 for qPCR to determine the efficiency ( $E = 10^{(-1/m)} - 1$ ; table 1). Primer pairs with efficiencies of 90-100% permit

513 the use of the comparative  $\Delta\Delta\text{CT}$  method for analysis (Livak and Schmittgen, 2001; Pfaffl, 2001).

514  
515 PCR was performed on 3  $\mu\text{l}$  of cDNA from single cells in a 30  $\mu\text{l}$  reaction volume containing 1X GoTaq Flexi  
516 buffer (Promega), 2 mM  $\text{MgCl}_2$ , 10 mM dNTP, 0.33  $\mu\text{M}$  forward and reverse primers, 2 U GoTaq Flexi  
517 Polymerase (Promega) and 0.22  $\mu\text{g}$  TaqStart Antibody (Clontech). 45-50 cycles of amplification were performed  
518 on a Bio-Rad C1000 thermocycler and the resulting product visualized with ethidium bromide on a 2% agarose  
519 gel.

520  
521 Quantitative PCR was performed on 4  $\mu\text{l}$  of cDNA from pools of 10 cells (4 pools/animal) in duplicate for the  
522 target genes (*Stim1*, *Stim2*) and 2  $\mu\text{l}$  in duplicate for the reference gene (*Gapdh*) in a 20  $\mu\text{l}$  reaction volume  
523 containing 1X Power SYBR Green PCR Master Mix (Applied Biosystems) and 0.5  $\mu\text{M}$  forward and reverse  
524 primers. Forty cycles of amplification were run on a Quant Studio 7 Flex Real-Time PCR System (Applied  
525 Biosystems) and the resulting data was analyzed using the comparative  $\Delta\Delta\text{CT}$  method (Livak and Schmittgen,  
526 2001; Pfaffl, 2001). The relative linear quantity was determined with the  $2^{-\Delta\Delta\text{CT}}$  equation (Bosch et al., 2013).  
527 The mean of all of the  $\Delta\text{CT}$  values ( $\Delta\text{CT} = \text{CT of the target gene} - \text{CT of the reference gene}$ ) from the controls  
528 was used as the calibrator and the data is expressed as fold change in gene expression.

### 529 *Drugs*

530  
531  
532 A standard artificial cerebrospinal fluid was used (Qiu J. et al., 2011). All drugs were purchased from Tocris  
533 Bioscience (Minneapolis, MN) unless otherwise specified. Purified guinea pig insulin was purchased from Dr. Al  
534 Parlow (Harbor-UCLA Medical Center, Torrance, CA, USA) through the National Hormone and Peptide Program.  
535 Tetrodotoxin (TTX) was purchased from Alomone Labs (Jerusalem, Israel) (1 mM) and dissolved in  $\text{H}_2\text{O}$ .  
536 Thapsigargin (Tg, 2 mM), TacR3 agonist senktide (1 mM), TRPC4/5 antagonist, HC 070 (from MCE, 10 mM),  
537 and the PI3K inhibitor wortmannin (Alomone Labs; 100  $\mu\text{M}$ ) were prepared in dimethylsulfoxide (DMSO). Aliquots  
538 of the stock solutions were stored as appropriate until needed.

## 540 *Data analysis*

541  
542 For qPCR four Kiss1 neuronal pools (10 cells/pool) from each animal were run in duplicate for the mRNAs  
543 that encode for STIM1, STIM2 and GAPDH and the mean value of each gene from each animal was used for  
544 statistical analysis. Data are expressed as Mean  $\pm$  SEM and were analyzed using an unpaired student's t-test.  
545 For scRT-PCR the number of Kiss1-positive cells harvested from Kiss1<sup>Cre:GFP</sup> females injected with Cre-  
546 dependent ChR2-mCherry or from Kiss1<sup>Cre:GFP::Ai32</sup> females were determined. Subsequently, the Kiss1-positive  
547 cells also positive for STIM1 and STIM2 were counted and used to qualitatively assess the number of Kiss1  
548 neurons with Stim1 and Stim2 and percent expression.

549  
550 Comparisons between different treatments were performed using a repeated measures, two-way or one-way  
551 ANOVA analysis with the *post hoc* Bonferroni's test. Differences were considered statistically significant if  $p <$   
552 0.05. All data are expressed as mean  $\pm$  SEM.

## 554 **Acknowledgements**

555 We thank Mr. Daniel Johnson for his technical support.

## 557 **Statement of Ethics**

558 Animal experimentation: This study was performed in strict accordance with the recommendations from the  
559 National Institutes of Health Guide for the care and use of Laboratory Animals. All animal procedures were  
560 conducted according to the approved institutional animal care and use committee (IACUC) protocols  
561 (#IP00000585; #IP00000382) at Oregon health and Science University. All surgeries were performed using  
562 aseptic techniques under isoflurane anesthesia, and every effort was made to minimize pain and suffering.

## 564 **Disclosure Statement**

565 The authors declare that no competing interests exist.



## 567 **Funding Sources**

568 This research was funded by National Institute of Health (NIH) grants: R01-NS043330 (OKR),  
569 R01-NS038809 (MJK) and R01-DK068098 (OKR and MJK). Confocal microscopy was supported by a  
570 P30 NS061800 (PI, S Aicher) grant.

## 572 **Author Contributions**

573 Jian Qiu, Todd L Stincic, Martha A Bosch, Ashley Connors, Data curation, Methodology, Writing—review and  
574 editing; Stefanie Kaech Petrie, Resources, Methodology, Writing—review and editing; Oline K Rønnekleiv,  
575 Martin J Kelly, Conceptualization, Resources, Data curation, Supervision, Funding acquisition, Validation,  
576 Methodology, Project administration, Writing—review and editing.

## 578 **References**

- 579  
580 Al-Qassab H, Smith MA, Irvine EE, Guillermet-Guibert J, Claret M, Choudhury AI, Selman C, Piipari K,  
581 Clements M, Lingard S, Chandarana K, Bell JD, Barsh GS, Smith AJH, Batterham RL, Ashford MLJ,  
582 Vanhaesebroeck B, & Withers DJ. 2009. Dominant role of the p110 $\beta$  isoform of PI3K over p110 $\alpha$  in  
583 energy homeostasis regulation by POMC and AgRP neurons. *Cell Metabolism* **10**: 343-354.  
584 DOI:10.1016/j.cmet.2009.09.008, PMID: 19883613.
- 585 Aponte Y, Atasoy D, & Sternson SM. 2011. AGRP neurons are sufficient to orchestrate feeding behavior  
586 rapidly and without training. *Nature Neuroscience* **14**: 351-355. DOI:10.1038/nn.2739, PMID:  
587 21209617.
- 588 Ayala JE, Samuel VT, Morton GJ, Obici S, Croniger CM, Shulman GI, Wasserman DH, McGuinness OP, &  
589 Consortium NIHMMPC. 2010. Standard operating procedures for describing and performing metabolic  
590 tests of glucose homeostasis in mice. *Disease Models & Mechanisms* **3**: 525-534.  
591 DOI:10.1242/dmm.006239, PMID: 20713647.
- 592 Bae YS, Cantley LG, Chen C-S, Kim S-R, Kwon K-S, & Rhee SG. 1998. Activation of phospholipase C- $\gamma$  by  
593 phosphatidylinositol 3,4,5-trisphosphate. *Journal of Biological Chemistry* **273**: 4465-4469.

- 594 DOI:10.1074/jbc.273.8.4465, PMID: 9468499.
- 595 Benoit SC, Air EL, Coolen LM, Strauss R, Jackman A, Clegg DJ, Seeley RJ, & Woods SC. 2002. The catabolic  
596 action of insulin in the brain is mediated by melanocortins. *The Journal of Neuroscience* **22**: 9048-9052.  
597 DOI:10.1523/JNEUROSCI.22-20-09048.2002, PMID: 12388611.
- 598 Berna-Erro A, Braun A, Kraft R, Kleinschnitz C, Schuhmann MK, Stegner D, Wultsch T, Eilers J, Meuth SG,  
599 Stoll G, & Nieswandt B. 2009. STIM2 Regulates Capacitive Ca<sup>2+</sup> Entry in Neurons and Plays a Key  
600 Role in Hypoxic Neuronal Cell Death. *Science Signaling* **2**: ra67-ra67. DOI:10.1126/scisignal.2000522,  
601 PMID: 19843959.
- 602 Bezzerides VJ, Ramsey IS, Kotecha S, Greka A, & Clapham DE. 2004. Rapid vesicular translocation and  
603 insertion of TRP channels. *Nature Cell Biology* **6**: 709-720. DOI:10.1038/ncb1150, PMID: 15258588.
- 604 Birnbaumer L. 2009. The TRPC class of ion channels: a critical review of their roles in slow, sustained  
605 increases in intracellular Ca<sup>2+</sup> concentrations. *Annual Review of Pharmacology and Toxicology* **49**: 395-  
606 426. DOI:10.1146/annurev.pharmtox.48.113006.094928, PMID: 19281310.
- 607 Blair NT, Kaczmarek JS, & Clapham DE. 2009. Intracellular calcium strongly potentiates agonist-activated  
608 TRPC5 channels. *The Journal of General Physiology* **133**: 525-546. DOI:10.1085/jgp.200810153,  
609 PMID: 19398778.
- 610 Bosch MA, Tonsfeldt KJ, & Rønnekleiv OK. 2013. mRNA expression of ion channels in GnRH neurons:  
611 subtype-specific regulation by 17β-Estradiol. *Molecular and Cellular Endocrinology* **367**: 85-97.  
612 DOI:10.1016/j.mce.2012.12.021, PMID: 23305677.
- 613 Brini M, Cali T, Ottolini D, & Carafoli E. 2014. Neuronal calcium signaling: function and dysfunction. *Cellular  
614 and Molecular Life Sciences* **71**: 2787-2814. DOI:10.1007/s00018-013-1550-7, PMID: 24442513.
- 615 Brown LM, Clegg DJ, Benoit SC, & Woods SC. 2006. Intraventricular insulin and leptin reduce food intake and  
616 body weight in C57BL/6J mice. *Physiology & Behavior* **89**: 687-691.  
617 DOI:10.1016/j.physbeh.2006.08.008, PMID: 16979194.
- 618 Bruning JC, Gautam D, Burks DJ, Gillette J, Schubert M, Orban PC, Klein R, Krone W, Muller-Wieland D, &  
619 Kahn CR. 2000. Role of brain insulin receptor in control of body weight and reproduction. *Science* **289**:  
620 2122-2125. DOI:10.1126/science.289.5487.2122, PMID: 11000114.

- 621 Bucholtz DC, Chiesa A, Pappano WN, Nagatani S, Tsukamura H, Maeda K-I, & Foster DL. 2000. Regulation of  
622 Pulsatile Luteinizing Hormone Secretion by Insulin in the Diabetic Male Lamb1. *Biology of Reproduction*  
623 **62**: 1248-1255. DOI:10.1095/biolreprod62.5.1248, PMID: 10775173.
- 624 Clarkson J, Han SY, Piet R, McLennan T, Kane GM, Ng J, Porteous RW, Kim JS, Colledge WH, Iremonger KJ,  
625 & Herbison AE. 2017. Definition of the hypothalamic GnRH pulse generator in mice. *Proceedings of the*  
626 *National Academy of Sciences of the United States of America* **114**: E10216-E10223.  
627 DOI:10.1073/pnas.1713897114, PMID: 29109258.
- 628 Clegg DJ. 2012. Minireview: the year in review of estrogen regulation of metabolism. *Molecular Endocrinology*  
629 **26**: 1957-1960. DOI:10.1210/me.2012-1284, PMID: 23051593.
- 630 Clegg DJ, Gotoh K, Kemp C, Wortman MD, Benoit SC, Brown LM, D'Alessio D, Tso P, Seeley RJ, & Woods  
631 SC. 2011. Consumption of a high-fat diet induces central insulin resistance independent of adiposity.  
632 *Physiology & Behavior* **103**: 10-16. DOI:10.1016/j.physbeh.2011.01.010, PMID: 21241723.
- 633 de Croft S, Boehm U, & Herbison AE. 2013. Neurokinin B activates arcuate kisspeptin neurons through  
634 multiple tachykinin receptors in the male mouse. *Endocrinology* **154**: 2750-2760. DOI:10.1210/en.2013-  
635 1231, PMID: 23744641.
- 636 Dittmer PJ, Wild AR, Dell'Acqua ML, & Sather WA. 2017. STIM1 Ca<sup>2+</sup> Sensor Control of L-type Ca<sup>2+</sup>-Channel-  
637 Dependent Dendritic Spine Structural Plasticity and Nuclear Signaling. *Cell Reports* **19**: 321-334.  
638 DOI:10.1016/j.celrep.2017.03.056, PMID: 28402855.
- 639 Dodd GT, Decherf S, Loh K, Simonds SE, Wiede F, Balland E, Merry TL, Munzberg H, Zhang ZY, Kahn BB,  
640 Neel BG, Bence KK, Andrews ZB, Cowley MA, & Tiganis T. 2015. Leptin and insulin act on POMC  
641 neurons to promote the browning of white fat. *Cell* **160**: 88-104. DOI:10.1016/j.cell.2014.12.022, PMID:  
642 25594176.
- 643 Dodd GT, Michael NJ, Lee-Young RS, Mangiafico SP, Pryor JT, Munder AC, Simonds SE, Brüning JC, Zhang  
644 Z-Y, Cowley MA, Andrikopoulos S, Horvath TL, Spanswick D, & Tiganis T. 2018. Insulin regulates  
645 POMC neuronal plasticity to control glucose metabolism. *eLife* **7**: e38704. DOI:10.7554/eLife.38704,
- 646 Dudek M, Ziarniak K, Cateau M-L, Dufourny L, & Sliwowska JH. 2019. Diabetes type 2 and kisspeptin: Central  
647 and peripheral sex-specific actions. *Trends in Endocrinology & Metabolism* **30**: 833-843.

648

DOI:<https://doi.org/10.1016/j.tem.2019.07.002>,

649

Falasca M, Logan SK, Lehto VP, Baccante G, Lemmon MA, & Schlessinger J. 1998. Activation of

650

phospholipase C $\gamma$  by PI 3-kinase-induced PH domain-mediated membrane targeting. *The EMBO*

651

*Journal* **17**: 414-422. DOI:10.1093/emboj/17.2.414, PMID: 9430633.

652

Fenselau H, Campbell JN, Verstegen AM, Madara JC, Xu J, Shah BP, Resch JM, Yang Z, Mandelblat-Cerf Y,

653

Livneh Y, & Lowell BB. 2017. A rapidly acting glutamatergic ARC→PVH satiety circuit postsynaptically

654

regulated by  $\alpha$ -MSH. *Nature Neuroscience* **20**: 42-51. DOI:10.1038/nn.4442, PMID: 27869800.

655

Gao Y, Yao T, Deng Z, Sohn J-W, Sun J, Huang Y, Kong X, Yu K-J, Wang R-T, Chen H, Guo H, Yan J,

656

Cunningham KA, Chang Y, Liu T, & Williams KW. 2017. TrpC5 mediates acute leptin and serotonin

657

effects via *Pomc* neurons. *Cell Reports* **18**: 583-592. DOI:10.1016/j.celrep.2016.12.072, PMID:

658

28099839.

659

George JT, Veldhuis JD, Tena-Sempere M, Millar RP, & Anderson RA. 2013. Exploring the pathophysiology of

660

hypogonadism in men with type 2 diabetes: kisspeptin-10 stimulates serum testosterone and LH

661

secretion in men with type 2 diabetes and mild biochemical hypogonadism. *Clin Endocrinol (Oxf)* **79**:

662

100-104. DOI:10.1111/cen.12103, PMID: 23153270.

663

Goodman RL, Lehman MN, Smith JT, Coolen LM, de Oliveira CVR, Jafarzadehshirazi MR, Pereira A, Iqbal J,

664

Caraty A, Ciofi P, & Clarke IJ. 2007. Kisspeptin neurons in the arcuate nucleus of the ewe express both

665

dynorphin A and neurokinin B. *Endocrinology* **148**: 5752-5760. DOI:10.1210/en.2007-0961, PMID:

666

17823266.

667

Gruszczynska-Biegala J, Pomorski P, Wisniewska MB, & Kuznicki J. 2011. Differential Roles for STIM1 and

668

STIM2 in Store-Operated Calcium Entry in Rat Neurons. *PLOS One* **6**: e19285.

669

DOI:10.1371/journal.pone.0019285, PMID: 21541286.

670

Guner G, Guzelsoy G, Isleyen FS, Sahin GS, Akkaya C, Bayam E, Kotan EI, Kabakcioglu A, & Ince-Dunn G.

671

2017. NEUROD2 Regulates *Stim1* Expression and Store-Operated Calcium Entry in Cortical Neurons.

672

*eNeuro* **4**: ENEURO.0255-0216.2017. DOI:10.1523/eneuro.0255-16.2017, PMID: 28303257.

673

Hartmann J, Karl RM, Alexander RP, Adelsberger H, Brill MS, Rühlmann C, Ansel A, Sakimura K, Baba Y,

674

Kurosaki T, Misgeld T, & Konnerth A. 2014. STIM1 controls neuronal Ca<sup>2+</sup> signaling, mGluR1-

- 675 dependent synaptic transmission, and cerebellar motor behavior. *Neuron* **82**: 635-644.
- 676 DOI:10.1016/j.neuron.2014.03.027, PMID: 24811382.
- 677 Hill JW, Williams KW, Ye C, Luo J, Balthasar N, Coppari R, Cowley MA, Cantley LC, Lowell BB, & Elmquist JK.
- 678 2008. Acute effects of leptin require PI3K signaling in hypothalamic proopiomelanocortin neurons in
- 679 mice. *Journal of Clinical Investigation* **118**: 1796-1805. DOI:10.1172/JCI32964, PMID: 18382766.
- 680 Huang GN, Zeng W, Kim JY, Yuan JP, Han L, Muallem S, & Worley PF. 2006. STIM1 carboxyl-terminus
- 681 activates native SOC,  $I_{crac}$  and TRPC1 channels. *Nature Cell Biology* **8**: 1003-1010.
- 682 DOI:10.1038/ncb1454, PMID: 16906149.
- 683 Just S, Chenard BL, Ceci A, Strassmaier T, Chong JA, Blair NT, Gallaschun RJ, del Camino D, Cantin S,
- 684 D'Amours M, Eickmeier C, Fanger CM, Hecker C, Hessler DP, Hengerer B, Kroker KS, Malekiani S,
- 685 Mihalek R, McLaughlin J, Rast G, Witek J, Sauer A, Pryce CR, & Moran MM. 2018. Treatment with HC-
- 686 070, a potent inhibitor of TRPC4 and TRPC5, leads to anxiolytic and antidepressant effects in mice.
- 687 *PLOS One* **13**: e0191225. DOI:10.1371/journal.pone.0191225, PMID: 29385160.
- 688 Kelly MJ, Qiu J, & Rønnekleiv OK. 2018. TRPCing around the hypothalamus. *Frontiers in Neuroendocrinology*
- 689 **51**: 116-124. DOI:10.1016/j.yfrne.2018.05.004, PMID: 29859883.
- 690 Kelly MJ, & Rønnekleiv OK. 2012. Membrane-initiated actions of estradiol that regulate reproduction, energy
- 691 balance and body temperature. *Frontiers in Neuroendocrinology* **33**: 376-387.
- 692 Kim D, Jang S, Kim J, Park I, Ku K, Choi M, Lee S, Heo WD, Son GH, Choe HK, & Kim K. 2020. Kisspeptin
- 693 Neuron-Specific and Self-Sustained Calcium Oscillation in the Hypothalamic Arcuate Nucleus of
- 694 Neonatal Mice: Regulatory Factors of its Synchronization. *Neuroendocrinology*.
- 695 DOI:10.1159/000505922, PMID: 31935735.
- 696 Kinsey-Jones JS, Li XF, Luckman SM, & O'Byrne KT. 2008. Effects of kisspeptin-10 on the
- 697 electrophysiological manifestation of gonadotropin-releasing hormone pulse generator activity in the
- 698 female rat. *Endocrinology* **149**: 1004-1008. DOI:10.1210/en.2007-1505, PMID: 18063679.
- 699 Knobil E. 1981. Patterns of hypophysiotropic signals and gonadotropin secretion in the rhesus monkey. *Biology*
- 700 *of Reproduction* **24**: 44-49. DOI:10.1095/biolreprod24.1.44, PMID: 6781549.
- 701 Krashes MJ, Koda S, Ye C, Rogan SC, Adams AC, Cusher DS, Maratos-Flier E, Roth BL, & Lowell BB. 2011.

- 702 Rapid, reversible activation of AgRP neurons drives feeding behavior in mice. *Journal of Clinical*  
703 *Investigation* **121**: 1424-1428. DOI:10.1172/JCI46229, PMID: 21364278.
- 704 Lehman MN, Coolen LM, & Goodman RL. 2010. Minireview: kisspeptin/neurokinin B/dynorphin (KNDy) cells of  
705 the arcuate nucleus: a central node in the control of gonadotropin-releasing hormone secretion.  
706 *Endocrinology* **151**: 3479-3489. DOI:10.1210/en.2010-0022, PMID: 20501670.
- 707 Livak KJ, & Schmittgen TD. 2001. Analysis of relative gene expression data using real-time quantitative PCR  
708 and the  $2^{-\Delta\Delta CT}$  method. *Methods* **25**: 402-408. DOI:10.1006/meth.2001.1262, PMID: 11846609.
- 709 Madisen L, Mao T, Koch H, Zhuo JM, Berenyi A, Fujisawa S, Hsu YW, Garcia AJ, 3rd, Gu X, Zanella S, Kidney  
710 J, Gu H, Mao Y, Hooks BM, Boyden ES, Buzsaki G, Ramirez JM, Jones AR, Svoboda K, Han X, Turner  
711 EE, & Zeng H. 2012. A toolbox of Cre-dependent optogenetic transgenic mice for light-induced  
712 activation and silencing. *Nature Neuroscience* **15**: 793-802. DOI:10.1038/nn.3078, PMID: 22446880.
- 713 Moccia F, Zuccolo E, Soda T, Tanzi F, Guerra G, Mapelli L, Lodola F, & D'Angelo E. 2015. Stim and Orai  
714 proteins in neuronal Ca<sup>2+</sup> signaling and excitability. *Frontiers in Cellular Neuroscience* **9**: 153.  
715 DOI:10.3389/fncel.2015.00153, PMID: 25964739.
- 716 Navarro VM. 2020. Metabolic regulation of kisspeptin — the link between energy balance and reproduction.  
717 *Nature Reviews Endocrinology*. DOI:10.1038/s41574-020-0363-7, PMID: 32427949.
- 718 Navarro VM, Castellano JM, McConkey SM, Pineda R, Ruiz-Pino F, Pinilla L, Clifton DK, Tena-Sempere M, &  
719 Steiner RA. 2011. Interactions between kisspeptin and neurokinin B in the control of GnRH secretion in  
720 the female rat. *American Journal of Physiology: Endocrinology and Metabolism* **300**: E202-E210.  
721 DOI:10.1152/ajpendo.00517.2010, PMID: 21045176.
- 722 Navarro VM, Gottsch ML, Chavkin C, Okamura H, Clifton DK, & Steiner RA. 2009. Regulation of gonadotropin-  
723 releasing hormone secretion by kisspeptin/dynorphin/neurokinin B neurons in the arcuate nucleus of  
724 the mouse. *The Journal of Neuroscience* **29**: 11859-11866. DOI:10.1523/JNEUROSCI.1569-09.2009,  
725 PMID: 19776272.
- 726 Nguyen N, Biet M, Simard É, Bèliveau É, Francoeur N, Guillemette G, Dumaine R, Grandbois M, & Boulay G.  
727 2013. STIM1 participates in the contractile rhythmicity of HL-1 cells by moderating T-type Ca<sup>2+</sup> channel  
728 activity. *Biochimica et Biophysica Acta* **1833**: 1294-1303. DOI:10.1016/j.bbamcr.2013.02.027, PMID:



- 729 23458835.
- 730 Oh-hora M, Yamashita M, Hogan PG, Sharma S, Lamperti E, Chung W, Prakriya M, Feske S, & Rao A. 2008.
- 731 Dual functions for the endoplasmic reticulum calcium sensors STIM1 and STIM2 in T cell activation and
- 732 tolerance. *Nature Immunology* **9**: 432-443. DOI:10.1038/ni1574, PMID: 18327260.
- 733 Okamura H, Tsukamura H, Ohkura S, Uenoyama Y, Wakabayashi Y, & Maeda K. 2013. Kisspeptin and GnRH
- 734 pulse generation. *Advances in Experimental Medicine and Biology* **784**: 297-323. DOI:10.1007/978-1-
- 735 4614-6199-9\_14, PMID: 23550012.
- 736 Padilla SL, Johnson CW, Barker FD, Patterson MA, & Palmiter RD. 2018. A neural circuit underlying the
- 737 generation of hot flushes. *Cell Reports* **24**: 271-277. DOI:10.1016/j.celrep.2018.06.037, PMID:
- 738 29996088.
- 739 Padilla SL, Perez JG, Ben-Hamo M, Johnson CW, Sanchez REA, Bussi IL, Palmiter RD, & de la Iglesia HO.
- 740 2019. Kisspeptin neurons in the arcuate nucleus of the hypothalamus orchestrate circadian rhythms
- 741 and metabolism. *Current Biology* **29**: 592-604 e594. DOI:10.1016/j.cub.2019.01.022, PMID: 30744968.
- 742 Park CY, Shcheglovitov A, & Dolmetsch R. 2010. The CRAC channel activator STIM1 binds and inhibits L-type
- 743 voltage-gated calcium channels. *Science* **330**: 101-105. DOI:10.1126/science.1191027, PMID:
- 744 20929812.
- 745 Pavez M, Thompson AC, Arnott HJ, Mitchell CB, D'Atri I, Don EK, Chilton JK, Scott EK, Lin JY, Young KM,
- 746 Gasperini RJ, & Foa L. 2019. STIM1 Is Required for Remodeling of the Endoplasmic Reticulum and
- 747 Microtubule Cytoskeleton in Steering Growth Cones. *The Journal of Neuroscience* **39**: 5095-5114.
- 748 DOI:10.1523/jneurosci.2496-18.2019, PMID: 31023836.
- 749 Pfaffl MW. 2001. A new mathematical model for relative quantification in real-time RT-PCR. *Nucleic Acids*
- 750 *Research* **29**: e45. DOI:10.1093/nar/29.9.e45, PMID: 11328886.
- 751 Qiu J, Bosch MA, Meza C, Navarro UV, Nestor CC, Wagner EJ, Rønnekleiv OK, & Kelly MJ. 2018. Estradiol
- 752 protects proopiomelanocortin neurons against insulin resistance. *Endocrinology* **159**: 647-664.
- 753 DOI:10.1210/en.2017-00793, PMID: 29165691.
- 754 Qiu J, Bosch MA, Tobias SC, Grandy DK, Scanlan TS, Rønnekleiv OK, & Kelly MJ. 2003. Rapid signaling of
- 755 estrogen in hypothalamic neurons involves a novel G-protein-coupled estrogen receptor that activates



- 756 protein kinase C. *The Journal of Neuroscience* **23**: 9529-9540. DOI:10.1523/JNEUROSCI.23-29-  
757 09529.2003, PMID: 14573532.
- 758 Qiu J, Bosch MA, Tobias SC, Krust A, Graham S, Murphy S, Korach KS, Chambon P, Scanlan TS, Rønnekleiv  
759 OK, & Kelly MJ. 2006. A G-protein-coupled estrogen receptor is involved in hypothalamic control of  
760 energy homeostasis. *The Journal of Neuroscience* **26**: 5649-5655. DOI:10.1523/JNEUROSCI.0327-  
761 06.2006, PMID: 16723521.
- 762 Qiu J, Bosch MA, Zhang C, Rønnekleiv OK, & Kelly MJ. 2020. Estradiol protects neuropeptide Y/agouti-related  
763 peptide neurons against insulin resistance in females. *Neuroendocrinology* **110**: 105-118.  
764 DOI:10.1159/000501560, PMID: 31212279.
- 765 Qiu J, Fang Y, Bosch MA, Rønnekleiv OK, & Kelly MJ. 2011. Guinea pig kisspeptin neurons are depolarized by  
766 leptin via activation of TRPC channels. *Endocrinology* **152**: 1503-1514. DOI:10.1210/en.2010-1285,  
767 PMID: 21285322.
- 768 Qiu J, Fang Y, Rønnekleiv OK, & Kelly MJ. 2010. Leptin excites proopiomelanocortin neurons via activation of  
769 TRPC channels. *The Journal of Neuroscience* **30**: 1560-1565. DOI:10.1523/JNEUROSCI.4816-  
770 09.2010, PMID: 20107083.
- 771 Qiu J, Nestor CC, Zhang C, Padilla SL, Palmiter RD, Kelly MJ, & Rønnekleiv OK. 2016. High-frequency  
772 stimulation-induced peptide release synchronizes arcuate kisspeptin neurons and excited GnRH  
773 neurons. *eLife* **5**: e16246. DOI:10.7554/eLife.16246, PMID: 27549338.
- 774 Qiu J, Rivera HM, Bosch MA, Padilla SL, Stincic TL, Palmiter RD, Kelly MJ, & Rønnekleiv OK. 2018.  
775 Estrogenic-dependent glutamatergic neurotransmission from kisspeptin neurons governs feeding  
776 circuits in females. *eLife* **7**: e35656. DOI:10.7554/eLife.35656, PMID: 30079889.
- 777 Qiu J, Wagner EJ, Rønnekleiv OK, & Kelly MJ. 2018. Insulin and leptin excite anorexigenic pro-  
778 opiomelanocortin neurones via activation of TRPC5 channels. *Journal of Neuroendocrinology* **30**:  
779 e12501. DOI:10.1111/jne.12501, PMID: 28675783.
- 780 Qiu J, Zhang C, Borgquist A, Nestor CC, Smith AW, Bosch MA, Ku S, Wagner EJ, Rønnekleiv OK, & Kelly MJ.  
781 2014. Insulin excites anorexigenic proopiomelanocortin neurons via activation of canonical transient  
782 receptor potential channels. *Cell Metabolism* **19**: 682-693. DOI:10.1016/j.cmet.2014.03.004, PMID:

- 783 24703699.
- 784 Qiu X, Dowling AR, Marino JS, Faulkner LD, Bryant B, Bruning JC, Elias CF, & Hill JW. 2013. Delayed puberty  
785 but normal fertility in mice with selective deletion of insulin receptors from Kiss1 cells. *Endocrinology*  
786 **154**: 1337-1348. DOI:10.1210/en.2012-2056, PMID: 23392256.
- 787 Rameh LE, Rhee SG, Spokes K, Kazlauskas A, Cantley LC, & Cantley LG. 1998. Phosphoinositide 3-kinase  
788 regulates phospholipase C $\gamma$ -mediated calcium signaling. *Journal of Biological Chemistry* **273**: 23750-  
789 23757. DOI:10.1074/jbc.273.37.23750, PMID: 9726983.
- 790 Rodríguez-Menchaca AA, Adney SK, Zhou L, & Logothetis DE. 2012. Dual regulation of voltage-sensitive ion  
791 channels by PIP<sub>2</sub>. *Frontiers in Pharmacology* **3**: 170-170. DOI:10.3389/fphar.2012.00170, PMID:  
792 23055973.
- 793 Roepke TA, Bosch MA, Rick EA, Lee B, Wagner EJ, Seidlova-Wuttke D, Wuttke W, Scanlan TS, Rønnekleiv  
794 OK, & Kelly MJ. 2010. Contribution of a membrane estrogen receptor to the estrogenic regulation of  
795 body temperature and energy homeostasis. *Endocrinology* **151**: 4926-4937. DOI:10.1210/en.2010-  
796 0573, PMID: 20685867.
- 797 Rønnekleiv OK, Qiu J, & Kelly MJ. 2019. Arcuate Kisspeptin Neurons Coordinate Reproductive Activities with  
798 Metabolism. *Seminars in Reproductive Medicine* **37**: 131-140. DOI:10.1055/s-0039-3400251, PMID:  
799 31869841.
- 800 Ruka KA, Burger LL, & Moenter SM. 2013. Regulation of arcuate neurons coexpressing kisspeptin, neurokinin  
801 B, and dynorphin by modulators of neurokinin 3 and  $\kappa$ -opioid receptors in adult male mice.  
802 *Endocrinology* **154**: 2761-2771. DOI:10.1210/en.2013-1268, PMID: 23744642.
- 803 Ryu C, Jang DC, Jung D, Kim YG, Shim HG, Ryu H-H, Lee Y-S, Linden DJ, Worley PF, & Kim SJ. 2017.  
804 STIM1 regulates somatic Ca<sup>2+</sup> signals and intrinsic firing properties of cerebellar Purkinje neurons. *The*  
805 *Journal of Neuroscience* **37**: 8876. DOI:10.1523/JNEUROSCI.3973-16.2017, PMID: 28821659.
- 806 Salido GM, Jardin I, & Rosado JA. 2011. The TRPC ion channels: association with Orai1 and STIM1 proteins  
807 and participation in capacitative and non-capacitative calcium entry. *Advances in Experimental*  
808 *Medicine and Biology* **704**: 413-433. DOI:10.1007/978-94-007-0265-3\_23, PMID: 21290309.
- 809 Sliwowska JH, Fergani C, Gawalek M, Skowronska B, Fichna P, & Lehman MN. 2014. Insulin: its role in the

- 310 central control of reproduction. *Physiology & Behavior* **133**: 197-206.
- 311 DOI:10.1016/j.physbeh.2014.05.021, PMID: 24874777.
- 312 Smith AW, Bosch MA, Wagner EJ, Rønnekleiv OK, & Kelly MJ. 2013. The membrane estrogen receptor ligand
- 313 STX rapidly enhances GABAergic signaling in NPY/AgRP neurons: Role in mediating the anorexigenic
- 314 effects of 17 $\beta$ -estradiol. *American Journal of Physiology: Endocrinology and Metabolism* **305**: E632-
- 315 E640. DOI:10.1152/ajpendo.00281.2013, PMID: 23820624.
- 316 Somasundaram A, Shum AK, McBride HJ, Kessler JA, Feske S, Miller RJ, & Prakriya M. 2014. Store-Operated
- 317 CRAC Channels Regulate Gene Expression and Proliferation in Neural Progenitor Cells. *The Journal of*
- 318 *Neuroscience* **34**: 9107-9123. DOI:10.1523/jneurosci.0263-14.2014, PMID: 24990931.
- 319 Song WJ, Mondal P, Wolfe A, Alonso LC, Stamateris R, Ong BW, Lim OC, Yang KS, Radovick S, Novaira HJ,
- 320 Farber EA, Farber CR, Turner SD, & Hussain MA. 2014. Glucagon regulates hepatic kisspeptin to
- 321 impair insulin secretion. *Cell Metabolism* **19**: 667-681. DOI:10.1016/j.cmet.2014.03.005, PMID:
- 322 24703698.
- 323 Stincic TL, Rønnekleiv OK, & Kelly MJ. 2019. Membrane and nuclear initiated estrogenic regulation of
- 324 homeostasis. *Steroids*: 108428. DOI:10.1016/j.steroids.2019.108428, PMID: 31229508.
- 325 Sun Y, Zhang H, Selvaraj S, Sukumaran P, Lei S, Birnbaumer L, & Singh BB. 2017. Inhibition of L-Type Ca<sup>2+</sup>
- 326 channels by TRPC1-STIM1 complex is essential for the protection of dopaminergic neurons. *The*
- 327 *Journal of Neuroscience* **37**: 3364-3377. DOI:10.1523/JNEUROSCI.3010-16.2017, PMID: 28258168.
- 328 Tolson KP, Garcia C, Yen S, Simonds S, Stefanidis A, Lawrence A, Smith JT, & Kauffman AS. 2014. Impaired
- 329 kisspeptin signaling decreases metabolism and promotes glucose intolerance and obesity. *Journal of*
- 330 *Clinical Investigation* **124**: 3075-3079. DOI:10.1172/JCI71075, PMID: 24937427.
- 331 Wang H, Cheng X, Tian J, Xiao Y, Tian T, Xu F, Hong X, & Zhu MX. 2020. TRPC channels: Structure, function,
- 332 regulation and recent advances in small molecular probes. *Pharmacology & Therapeutics*: 107497.
- 333 DOI:10.1016/j.pharmthera.2020.107497, PMID: 32004513.
- 334 Wang Y, Deng X, Mancarella S, Hendron E, Eguchi S, Soboloff J, Tang XD, & Gill DL. 2010. The calcium store
- 335 sensor, STIM1, reciprocally controls Orai and Cav1.2 channels. *Science* **330**: 105-109.
- 336 DOI:10.1126/science.1191086, PMID: 20929813.

- 337 Wei Q, Krolewski DM, Moore S, Kumar V, Li F, Martin B, Tomer R, Murphy GG, Deisseroth K, Watson SJ, &  
338 Akil H. 2018. Uneven balance of power between hypothalamic peptidergic neurons in the control of  
339 feeding. *Proceedings of the National Academy of Sciences* **115**: E9489-E9498.  
340 DOI:10.1073/pnas.1802237115, PMID: 30224492.
- 341 Wilson RC, Kesner JS, Kaufman J-M, Uemura T, Akema T, & Knobil E. 1984. Central electrophysiological  
342 correlates of pulsatile luteinizing hormone secretion in the Rhesus monkey. *Neuroendocrinology* **39**:  
343 256-260. DOI:10.1159/000123988, PMID: 6504270.
- 344 Xu AW, Kaelin CB, Takeda K, Akira S, Schwartz MW, & Barsh GS. 2005. PI3K integrates the action of insulin  
345 and leptin on hypothalamic neurons. *Journal of Clinical Investigation* **115**: 951-958.  
346 DOI:10.1172/JCI24301, PMID: 15761497.
- 347 Yuan JP, Zeng W, Huang GN, Worley PF, & Muallem S. 2007. STIM1 heteromultimerizes TRPC channels to  
348 determine their function as store-operated channels. *Nature Cell Biology* **9**: 636-645.  
349 DOI:10.1038/ncb1590, PMID: 17486119.
- 350 Zhang C, Bosch MA, Rønnekleiv OK, & Kelly MJ. 2013. Kisspeptin activation of TRPC4 channels in female  
351 GnRH neurons requires PIP<sub>2</sub> depletion and cSrc kinase activation. *Endocrinology* **154**: 2772-2783.  
352 DOI:10.1210/en.2013-1180, PMID: 23744639.
- 353 Zhang C, Roepke TA, Kelly MJ, & Rønnekleiv OK. 2008. Kisspeptin depolarizes gonadotropin-releasing  
354 hormone neurons through activation of TRPC-like cationic channels. *The Journal of Neuroscience* **28**:  
355 4423-4434. DOI:10.1523/JNEUROSCI.5352-07.2008, PMID: 18434521.
- 356 Zhang C, Tonsfeldt KJ, Qiu J, Bosch MA, Kobayashi K, Steiner RA, Kelly MJ, & Rønnekleiv OK. 2013.  
357 Molecular mechanisms that drive estradiol-dependent burst firing of Kiss1 neurons in the rostral  
358 periventricular preoptic area. *American Journal of Physiology: Endocrinology and Metabolism* **305**:  
359 E1384-E1397. DOI:10.1152/ajpendo.00406.2013, PMID: 24105416.

Figures and Legends

FIGURE 1

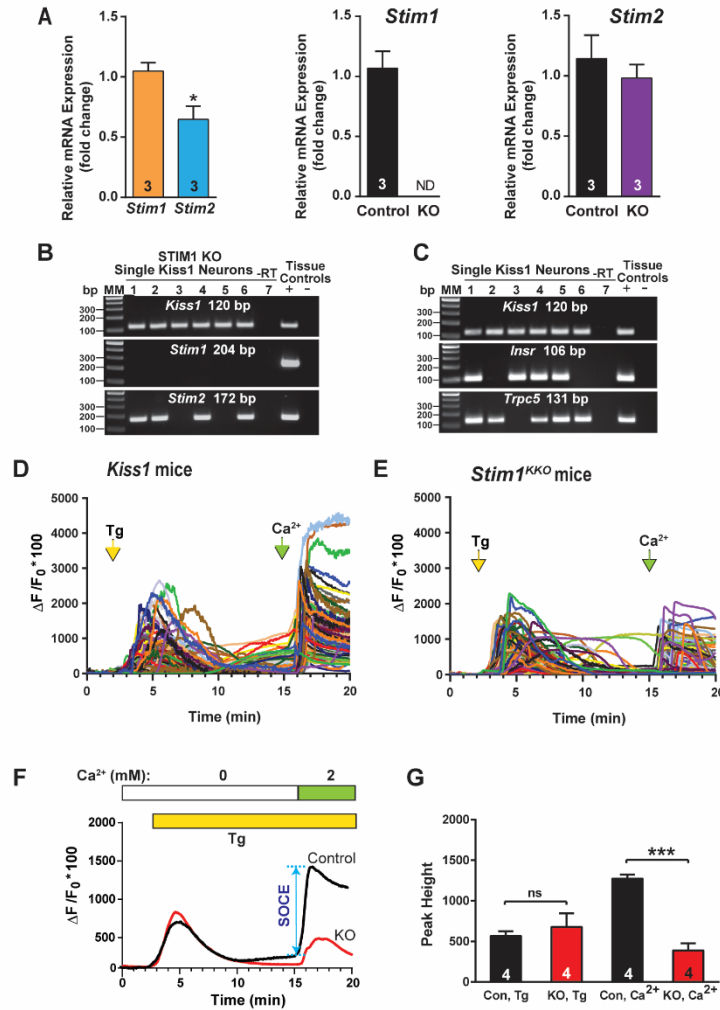

**Figure 1. Expression Patterns of *Stim1* and *2* in the arcuate *Kiss1* neurons.** **A**, quantitative PCR assay measuring *Stim1* and *Stim2* in *Kiss1<sup>ARH</sup>* neuronal pools (n = 3 animals, 10 cells in each pool, 4 pools/animal) from *Kiss1<sup>Cre</sup>* control and *Stim1<sup>kko</sup>* female mice (n=3 animals per group). Comparison between *Stim1* and *Stim2* in controls only. Bar graphs represent mean ± SEM (Unpaired *t*-test for the left,  $t_{(4)} = 3.079$ , \*  $p < 0.05$ ; For the middle, *Stim1* was non-detectable (ND) in the *STIM1<sup>KKO</sup>* neuronal pools; Unpaired *t*-test for the right,  $t_{(4)} = 0.7143$ ,  $p = 0.5145$ ). **B** and **C**, representative gels illustrating mRNA expression of *Stim1* and *Stim2* in single *Kiss1<sup>ARH</sup>* neurons from *Stim1<sup>kko</sup>* mice (**B**) and insulin receptor (*Insr*), and *Trpc5* subunit expression in single *Kiss1<sup>ARH</sup>* neurons from *Kiss1<sup>Cre</sup>* mice (**C**). The expected base pair (bp) sizes are *Kiss1*, 120 bp; *Stim1*, 204 bp; *Stim2*, 172

894 bp; *Insr*, 106 bp and *Trpc5*, 131 bp. A single neuron was processed without reverse transcriptase (-RT) and RNA  
895 extracted from hypothalamic tissue was used as positive (+, with RT) and negative (-, without RT) tissue controls.  
896 MM, molecular marker. **D** and **E**, representative traces of GCaMP6s activity based on cytosolic  $\text{Ca}^{2+}$   
897 measurements in Kiss1<sup>ARH</sup> neurons from *Kiss1<sup>Cre</sup>:GCaMP6s* mice (D) and *Stim1<sup>kkO</sup>:GCaMP6s* mice (E). ER  $\text{Ca}^{2+}$   
898 stores were depleted with 2  $\mu\text{M}$  thapsargin, a SERCA inhibitor, after 20 min of perfusion with aCSF containing  
899 0 mM  $\text{Ca}^{2+}$ . SOCE was evaluated by substituting the extracellular aCSF containing 0 mM  $\text{Ca}^{2+}$  with aCSF  
900 containing 2 mM  $\text{Ca}^{2+}$ . **F**, averaged traces from C and D revealed that deletion of *Stim1* in Kiss1<sup>ARH</sup> neurons  
901 attenuated the store-operated  $\text{Ca}^{2+}$  entry (SOCE). **G**, bar graphs summarizing the effects of depletion of  $\text{Ca}^{2+}$   
902 store by Tg and  $\text{Ca}^{2+}$  influx (SOCE) in Kiss1<sup>ARH</sup> neurons from *Kiss1<sup>Cre</sup>:GCaMP6s* and *Stim1<sup>kkO</sup>:GCaMP6s* mice  
903 (unpaired t-test,  $t_{(6)} = 0.6372$ ,  $p = 0.5475$  for depletion of  $\text{Ca}^{2+}$  store; Unpaired t-test,  $t_{(6)} = 8.921$ ,  $***p = 0.0001$   
904 for SOCE).

905



906  
907  
908  
909  
910  
911  
912  
913  
914  
915  
916  
917  
918  
919  
920  
921  
922  
923  
924  
925  
926  
927  
928  
929  
930  
931  
932

FIGURE 2

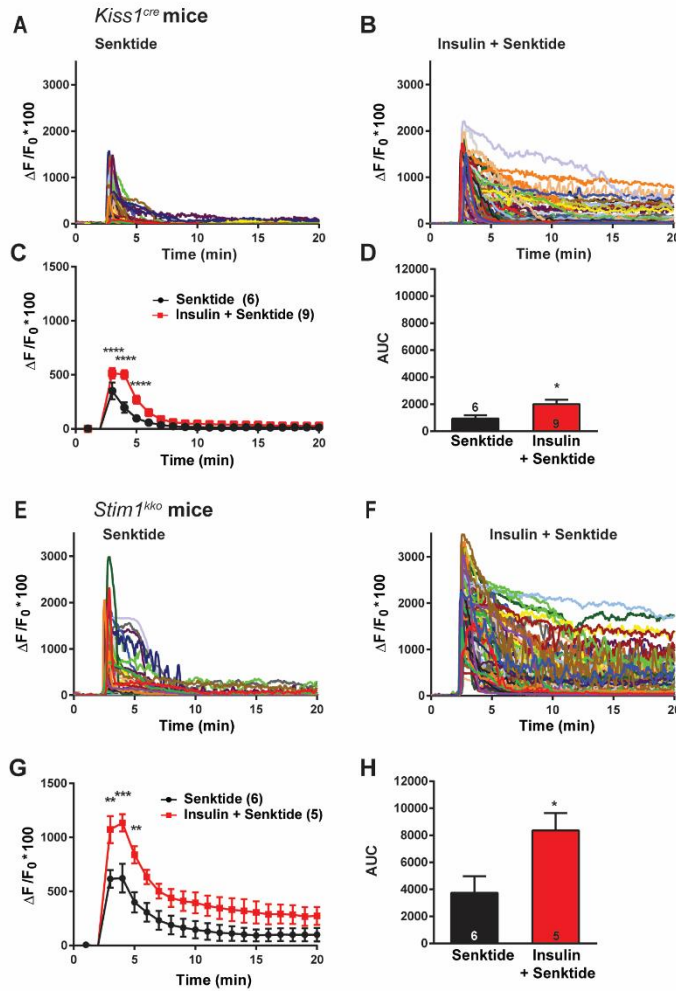

**Figure 2. Senktide-induced increase in  $[Ca^{2+}]_i$  is augmented by deletion of *Stim1* and further potentiated by insulin in GCaMP6s-expressing *Kiss1<sup>ARH</sup>* neurons from *Kiss1* and *Stim1<sup>kko</sup>* mice. A and B, representative traces of senktide-induced  $[Ca^{2+}]_i$  in the presence or absence of insulin. Traces represent individual cells within a single slice. C, summary of the potentiation of senktide-induced  $[Ca^{2+}]_i$  after bath-applied insulin for 18 minutes. Two-way ANOVA: main effect of treatment ( $F_{(1,13)} = 5.673$ ,  $p = 0.0332$ ), main effect of time ( $F_{(19,247)} = 82.29$ ,  $p < 0.0001$ ) and interaction ( $F_{(19,247)} = 8.725$ ,  $p < 0.0001$ ); n = number of slices; *post hoc* Bonferroni test, \*\*\*\* $p < 0.001$ . D, relative AUC of *Kiss1<sup>ARH</sup>* neurons from C. There was a significant difference (Unpaired *t*-test,  $t_{(13)} = 2.395$ , \* $p = 0.0324$ ) between the groups. E and F, representative traces of senktide-induced  $[Ca^{2+}]_i$  in the presence or absence of insulin in *Kiss1<sup>ARH</sup>* neurons from *Stim1<sup>kko</sup>* mice. G, summary of the potentiation of senktide-induced  $[Ca^{2+}]_i$  after bath-applied insulin (20 nM) for 18 minutes in *Kiss1<sup>ARH</sup>* neurons**

from *Stim1<sup>kkO</sup>* mice. Two-way ANOVA: main effect of treatment ( $F_{(1,9)} = 6.575, p = 0.0305$ ), main effect of time ( $F_{(19,171)} = 48.44, p < 0.0001$ ) and interaction ( $F_{(19,171)} = 3.548, p < 0.0001$ ); *post hoc* Bonferroni test,  $**p < 0.01$  and  $***p < 0.005$ . **H**, relative AUC of Kiss1<sup>ARH</sup> neurons from G (unpaired *t*-test,  $t_{(9)} = 2.586, *p = 0.0294$ ).

**Supplemental video 1. Neurokinin B receptor agonist senktide induces  $[Ca^{2+}]_i$  increase in Kiss1<sup>ARH</sup> neurons expressing GCaMP6s.** Imaging of transient  $Ca^{2+}$  changes in an arcuate slice using spinning disk confocal microscopy. Fluorescence intensity was measured over 20 minutes, before and after application of senktide (1  $\mu$ M).

FIGURE 3

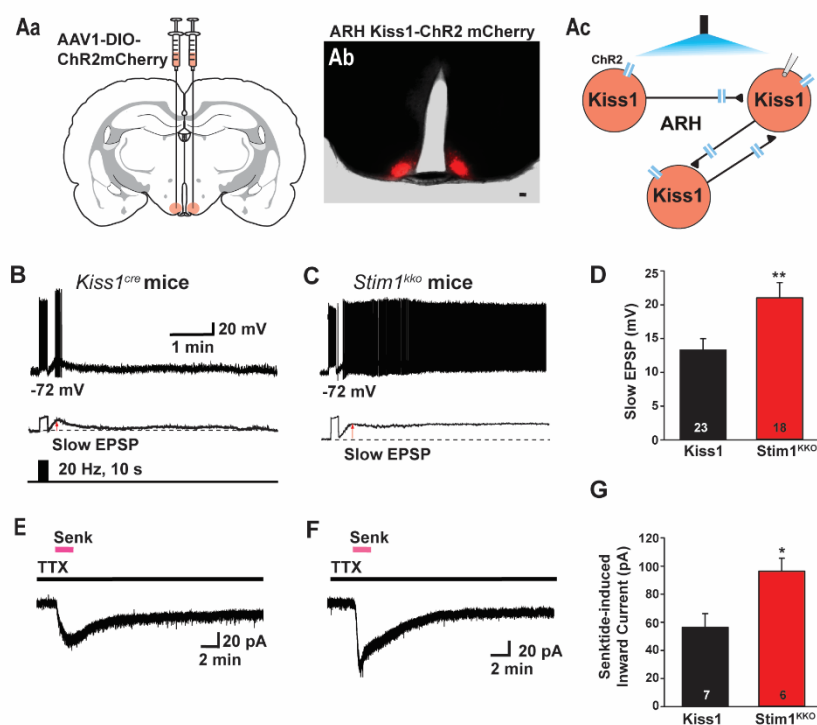

**Figure 3. Deletion of *Stim1* augments high-frequency optogenetic stimulation-induced slow EPSP and senktide-induced depolarization in Kiss1<sup>ARH</sup> neurons.** **Aa**, schematic of a coronal section showing the bilateral viral injections in the ARH with AAV-DIO-ChR2:mCherry. **Ab**, photomicrographs showing coronal sections confirming targeted bilateral injections of DIO-ChR2:mCherry into the arcuate. **Ac**, Experimental protocol: high-frequency photostimulation of Kiss1<sup>ARH</sup> neurons/terminals and recording of Kiss1<sup>ARH</sup> neurons. Scale bars, 200  $\mu$ m for Ab. **B,C**, high-frequency optogenetic stimulation (20 Hz, 10 s) generated slow EPSPs in

a ChR2-expressing *Kiss1*<sup>ARH</sup> neuron from control *Kiss1* mice (B) and in a ChR2-expressing *Kiss1*<sup>ARH</sup> neuron from *Stim1*<sup>kk0</sup> mice (C). The lower trace shows the slow EPSP after low-pass filtering from B and C (arrow), respectively. D, summary of the effects of *Stim1* deletion on the slow EPSP amplitude. Bar graphs represent the mean  $\pm$  SEM (Unpaired *t*-test,  $t_{(39)} = 2.802$ ,  $**p = 0.0079$ ). E and F, rapid bath application of senktide (1  $\mu$ M) induced an inward current in the presence of fast sodium channel blockade (TTX, 1 $\mu$ M) in *Kiss1*<sup>ARH</sup> neurons from *Kiss1*<sup>Cre</sup> and *Stim1*<sup>kk0</sup> mice.  $V_{\text{hold}} = -60$  mV. G, summary of the effects of senktide in *Kiss1*<sup>ARH</sup> neurons from *Kiss1*<sup>Cre</sup> and *Stim1*<sup>kk0</sup> mice (Unpaired *t*-test,  $t_{(11)} = 2.929$ ,  $*p = 0.0137$ ). Data points represent the mean  $\pm$  SEM. Cell numbers are indicated.

**Supplemental Video 2. High frequency photo-stimulation induces a slow excitatory postsynaptic potential (slow EPSP).** Slow EPSP was induced by a 10-s 20 Hz photostimulation (light intensity 0.9 mW and pulse duration, 10 ms) in a ChR2-expressing *Kiss1*<sup>ARH</sup> neuron in a slice from a *Kiss1*<sup>Cre::Ai32</sup> mouse.

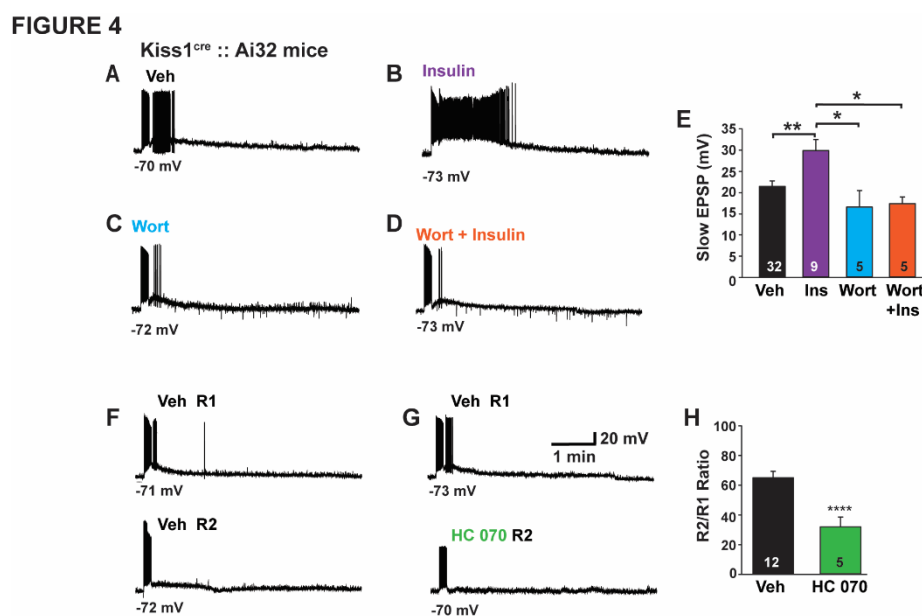

**Figure 4. Insulin augments the slow EPSP in *Kiss1*<sup>ARH</sup> neurons from *Kiss1*<sup>Cre::Ai32</sup> mice in a PI3K dependent manner and senktide-induced depolarization is antagonized by TRPC5 channel blockers.** A–D, representative traces of the slow EPSPs in the presence or absence of PI3 kinase inhibitor wortmannin (100 nM) or insulin (20 nM). E, summary of the effects of wortmannin on the insulin-potentiated slow EPSP. The PI3

kinase blocker was applied for 15 min before the application of insulin (20 nM). Comparisons between different treatments were assessed using a one-way ANOVA ( $F_{(3, 47)} = 5.0301$ ,  $p < 0.0042$ ) and the Newman-Keuls's *post hoc* test.  $**p < 0.01$ , Veh versus Ins;  $*p < 0.05$ , Ins versus Wort or Wort + Ins. **F–G**, representative traces of high-frequency optogenetic stimulation-induced slow EPSPs in the presence or absence of TRPC4/5 channel blocker HC 070 (100 nM). **H**, summary of the effects of HC 070 on the slow EPSP (Un-paired t-test,  $t_{(15)} = 4.122$ ,  $****p = 0.0009$ ).

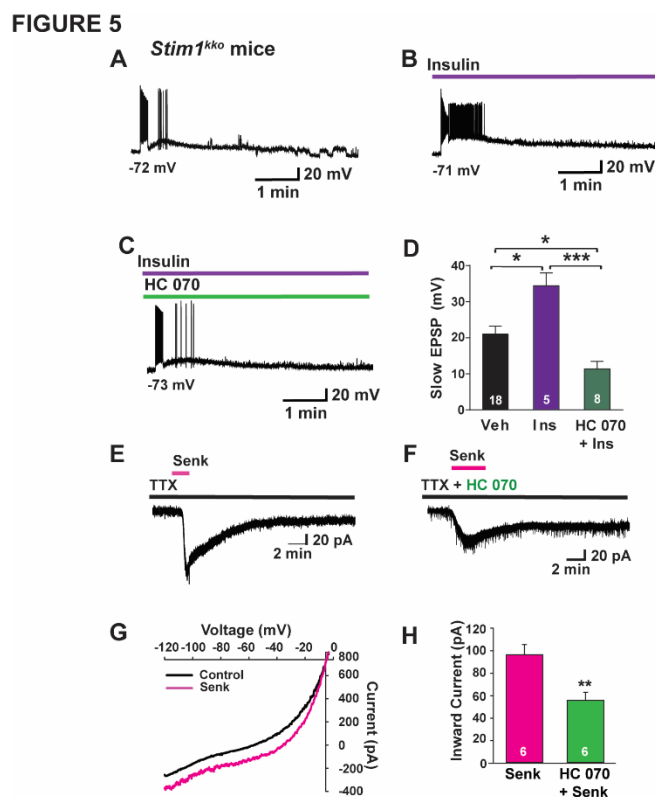

**Figure 5. Insulin augments the effects of *Stim1* deletion on the slow EPSP and the senktide-induced depolarization is antagonized by the TRPC5 channel blocker HC 070.** **A** and **B**, representative traces of the slow EPSP in the presence or absence of insulin (20 nM) in ChR2-expressing Kiss1<sup>ARH</sup> neurons from *Stim1<sup>kk0</sup>* mice. **C**, a representative trace of the slow EPSP in the presence of selective TRPC5 channel blocker HC 070 (100 nM) and insulin in a ChR2-expressing Kiss1<sup>ARH</sup> neuron from *Stim1<sup>kk0</sup>* mice. **D**, summary of the effects of insulin applied for 20 min before high-frequency optogenetic stimulation in the presence or absence of the TRPC5 channel blocker HC 070 (100 nM) on slow EPSPs. Comparisons between different treatments were

assessed using a one-way ANOVA ( $F_{(2, 28)} = 11.16$ ,  $p = 0.0003$ ) and the Newman-Keuls's *post hoc* test.  $***p < 0.005$ , *Ins versus HC 070+Ins*;  $*p < 0.05$ , *Veh versus Ins* or *HC 070+Ins*. **E–F**, representative traces of senktide-induced inward current in *Stim1<sup>kk0</sup>* neurons perfused with TTX (1  $\mu$ M) in the presence or absence of TRPC4/5 blocker HC 070. **G**, the I-V relationship before and during the peak response from the same cell in E indicated that the reversal potential of the nonselective cation current was  $\sim -10$  mV. **H**, summary of the effects of HC 070 on the senktide-induced inward current (Un-paired t-test,  $t_{(10)} = 3.457$ ,  $**p = 0.0062$ ). Data points represent the mean  $\pm$  SEM. Cell numbers are indicated.

FIGURE 6

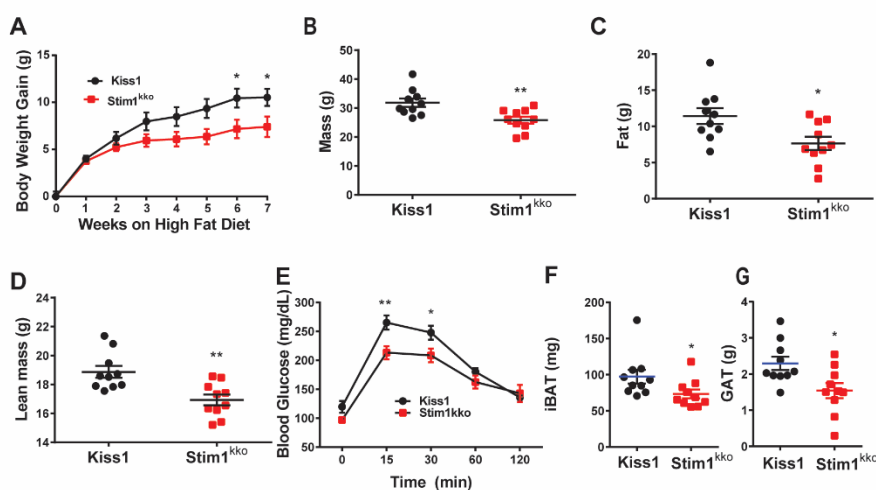

**Figure 6. Ablation of Stim1 in Kiss1 neurons attenuates body mass, fat, and lean in mice on a high fat diet.** *Stim1<sup>kk0</sup>* and *Kiss1<sup>Cre</sup>* littermate control females were ovariectomized and fed a high fat diet (HFD; 45% kcal from fat) for seven weeks. **A**, body-weight gain measured once a week for seven weeks. The high fat diet caused significant weight gain in both groups relative to their baseline with the *Kiss1<sup>Cre</sup>* females gaining significantly weight more by 6 weeks [two-way ANOVA: main effect of treatment ( $F_{(1, 18)} = 3.839$ ,  $p = 0.0657$ ), main effect of time ( $F_{(7, 126)} = 98.07$ ,  $p < 0.0001$ ) and interaction ( $F_{(7, 126)} = 4.645$ ,  $p = 0.0001$ ); *Kiss1* control,  $n = 10$ , *Stim1<sup>kk0</sup>*,  $n = 10$ ; *post hoc* Bonferroni test,  $*p < 0.05$ ]. **B–D**, mass (B), total body fat (C) and lean mass (D) measured by an EchoMRI Whole Body Composition Analyzer. Lean mass does not include bone and fluids within organs. The difference in mass (B), body fat (C) and lean mass (D) between the groups was significantly different by 6 weeks

on high fat diet (unpaired, two-tailed t-test for B,  $t_{(18)} = 3.222$ ,  $**p = 0.0047$ ; unpaired two-tailed t test for C,  $t_{(18)} = 2.662$ ,  $*p = 0.0159$ ; unpaired, two-tailed t test for D,  $t_{(18)} = 3.489$ ,  $*p = 0.0026$ ). **E**, six weeks after high fat diet, there was a significant difference in GTTs between the two groups (two-way ANOVA: main effect of treatment ( $F_{(1, 9)} = 6.282$ ,  $p = 0.0335$ ), main effect of time ( $F_{(4, 36)} = 88.01$ ,  $p < 0.0001$ ) and interaction ( $F_{(4, 36)} = 3.527$ ,  $p = 0.0158$ ); *Kiss1<sup>Cre</sup>*,  $n = 6$ , *Stim1<sup>kk0</sup>*,  $n = 5$ ; *post hoc* Bonferroni test,  $**p < 0.01$ ,  $*p < 0.05$ ). **F** and **G**, both interscapular brown adipose tissue (iBAT) and perigonadal adipose tissue (GAT) mass of *Stim1<sup>kk0</sup>* were lighter than that of *Kiss1<sup>Cre</sup>* mice on a fat diet after eight weeks (unpaired, two-tailed t test for iBAT,  $t_{(18)} = 2.127$ ,  $*p = 0.0475$ ; unpaired two-tailed t-test for GAT,  $t_{(18)} = 2.711$ ,  $*p = 0.0143$ ).

FIGURE 7

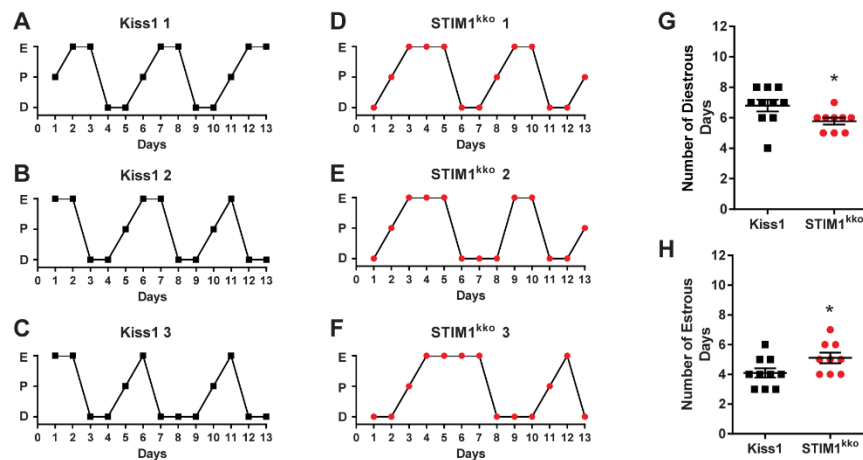

**Figure 7. *Stim1<sup>kk0</sup>* mice exhibit more estrous days.** **A-F**, representative estrous cycle data from three representative control *Kiss1<sup>Cre</sup>* and three *Stim1<sup>kk0</sup>* mice over a thirteen-day period. Vaginal lavage was done daily at 0930 h, and cell cytology was observed and recorded as Diestrus (D), Proestrus (P) or Estrus (E). Summary data for the number of Diestrous days (**G**) and Estrous days (**H**) during the 13 day period was compared between *Kiss1<sup>Cre</sup>* ( $n = 10$ ) and *Stim1<sup>kk0</sup>* mice ( $n = 9$ ) (unpaired, two-tailed t test for G,  $t_{(17)} = 2.215$ ,  $*p = 0.0407$ ; unpaired two-tailed t-test for H,  $t_{(17)} = 2.151$ ,  $*p = 0.0461$ ).



FIGURE 8

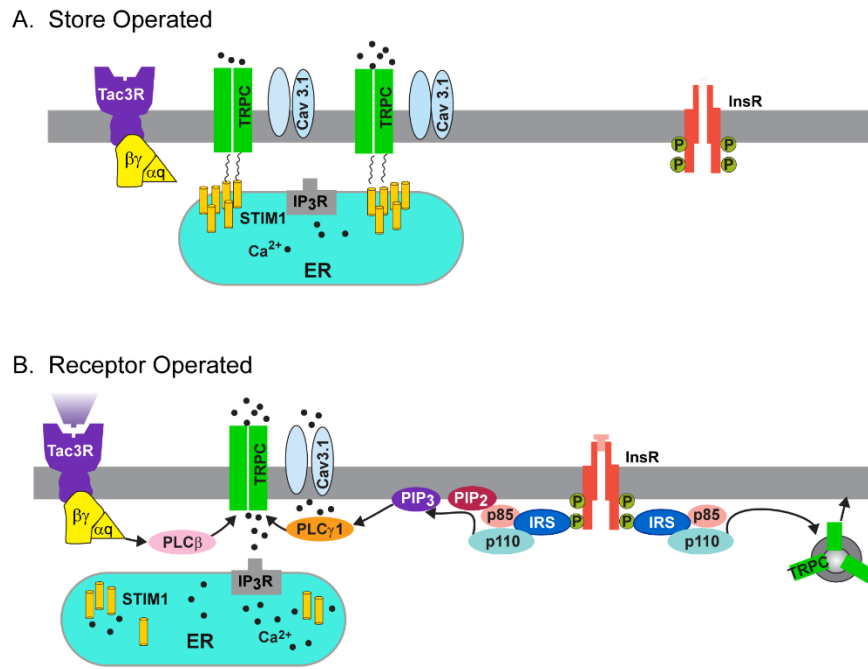

**Figure 8. A cellular model of insulin and NKB activation of TRPC5 channels in Kiss1<sup>ARH</sup> neurons.** **A**, under physiological stress and in the absence of E<sub>2</sub>, stromal interaction molecule 1 (STIM1) interacts with TRPC5 channels thereby engaging these Ca<sup>2+</sup> channels as store-operated channels, which are activated with endoplasmic reticulum (ER) depletion of Ca<sup>2+</sup>. **B**, however, under physiological conditions in reproductively active females, E<sub>2</sub> down-regulates the expression of STIM1, thereby converting the TRPC5 channels to receptor-operated channels in Kiss1<sup>ARH</sup> neurons. Insulin signals via InsR-IRS-PI3K-PLCγ1 to activate TRPC5 channels, generating a robust inward Na<sup>+</sup>/Ca<sup>2+</sup> current to depolarize Kiss1<sup>ARH</sup> neurons, activating T-type calcium (Cav3.1) channels to greatly increase Kiss1<sup>ARH</sup> neuronal excitability. PI3K (p85/p110) will also accelerate the rapid insertion of TRPC5 channels into the plasma membrane (Bezzarides et al., 2004), which underlies the insulin augmentation of the excitatory effects of NKB in Kiss1<sup>ARH</sup> neurons. Neurokinin B (NKB) binds to its receptor (Tac3R) to activate Gαq – PLCβ signaling cascade to facilitate TRPC5 channels opening.

**Table 1. Primer Table**

| Gene Name<br>(encodes for)          | Accession<br>Number | Primer<br>Location (bp)                    | Product<br>Length (bp) | Annealing<br>Temp (°C)            | Efficiency |                |     |
|-------------------------------------|---------------------|--------------------------------------------|------------------------|-----------------------------------|------------|----------------|-----|
|                                     |                     |                                            |                        |                                   | Slope      | r <sup>2</sup> | %   |
| <i>Kiss1</i> (Kiss1) <sup>a,b</sup> | NM_178260           | 64-80 (exon 1)<br>167-183 (exon 2)         | 120                    | 57 <sup>a</sup> , 60 <sup>b</sup> | -3.410     | 0.989          | 97  |
| <i>Stim1</i> (STIM1) <sup>a</sup>   | NM_009287           | 797-816 (exon 2)<br>981-1000 (exon 3)      | 204                    | 59                                |            |                |     |
| <i>Stim1</i> (STIM1) <sup>b</sup>   | NM_009287           | 821-839 (exon 2)<br>937-955 (exon 3)       | 135                    | 60                                | -3.311     | 0.977          | 100 |
| <i>Stim2</i> (STIM2) <sup>a</sup>   | NM_001363348        | 620-638 (exon 2)<br>773-791 (exon 4)       | 172                    | 59                                |            |                |     |
| <i>Stim2</i> (STIM2) <sup>b</sup>   | NM_001363348        | 1784-1803 (exon 11)<br>1895-1914 (exon 12) | 131                    | 60                                | -3.439     | 0.993          | 95  |
| <i>Gapdh</i> (GAPDH) <sup>b</sup>   | NM_008084           | 689-706 (exon 4)<br>764-781 (exon 5)       | 93                     | 60                                | -3.352     | 0.998          | 99  |
| <i>Insr</i> (IR) <sup>a</sup>       | NM_001330056        | 3649-3668 (exon 17)<br>3733-3754 (exon 18) | 172                    | 61                                |            |                |     |
| <i>Trpc5</i> (TRPC5) <sup>a</sup>   | NM_009428           | 2206-2227 (exon 6)<br>2315-2336 (exon 7)   | 131                    | 63                                |            |                |     |

<sup>a</sup>primers for scRT-PCR.

<sup>b</sup>primers for qPCR.
